# Supplementary material for: The complete change in bile acids and steroids in systematic metabolomics applied to the intrahepatic cholestasis of pregnancy
Source: Royal Society of Chemistry journal article supplement (doi:10.1039/d2mo00305h), 2023-03-31
Supplement: d2mo00305h23.xlsx [file d2mo00305h23.xlsx]

## Sheet: Urine
Class	Metabolite	HMDB	KEGG	Metabolic Pathway	Theoretical m/z	m/z accuracy(ppm)	P-value	Q-value	Fold Change	VIP	CV% of QC
Amino acid	N1-Acetylspermidine	HMDB0001276	C00612		188.176	2.40859	0.0148245	0.242653	1.68742	1.1866	0.0137368
Amino acid	Tryptamine	HMDB0000303	C00398	map00380 Tryptophan metabolism	144.081	-0.21161	0.0323306	0.335161	1.86164	1.15092	0.0285281
Amino acid	N6,N6,N6-Trimethyl-L-lysine	HMDB0001325	C03793	map00310 Lysine degradation	189.16	-0.353	0.00968227	0.20832	1.6888	0.969427	0.009689
Amino acid	Phenylacetylglycine	HMDB0000821	C05598	map00360 Phenylalanine metabolism	192.067	1.19102	0.0211002	0.297206	0.0537121	1.79787	0.0189644
Amino acid	(R)-2,3-Dihydroxy-isovalerate	HMDB0012141	C04272	map00290 Valine, leucine and isoleucine biosynthesis	133.051	2.85705	0.0471521	0.407341	4.78676	1.30011	0.00943625
Amino acid	Pyroglutamic acid	HMDB0000267	C01879	map00480 Glutathione metabolism	128.035	1.93882	0.033798	0.3368	1.59533	1.03651	0.0820644
Bile acid	Glycochenodeoxycholate-3-sulfate	HMDB0002497		[Secondary Bile Acid Metabolism]	528.264	-0.67076	0.0227855	0.297206	2.8697	1.59451	0.011906
Bile acid	Taurocholic acid	HMDB0000036	C05122	[map00120 Primary bile acid biosynthesis]	514.284	-0.66575	2.37202e-05	0.002459	13.3016	2.20555	0.014116
Bile acid	Taurochenodesoxycholic acid	HMDB0000951	C05465	[map00120 Primary bile acid biosynthesis]	498.289	-0.10293	0.0100476	0.20832	6.33642	1.54089	0.0141632
Bile acid	Glycohyocholic acid	HMDB0240607		[Bile acid metabolism]	464.302	-0.66199	1.93326e-05	0.002459	11.4126	2.69324	0.0178164
Bile acid	Glycoursodeoxycholic acid	HMDB0000708		[Secondary Bile Acid Metabolism]	448.307	-0.53511	7.14733e-05	0.0037047	125.891	3.49298	0.021929
Bile acid	Glycocholic acid	HMDB0000138	C01921	[map00120 Primary bile acid biosynthesis]	464.302	-1.64791	1.79355e-05	0.002459	11.7274	2.61116	0.0226911
Bile acid	Cholic acid	HMDB0000619	C00695	[map00120 Primary bile acid biosynthesis]	407.28	-0.66466	0.00685393	0.163967	4.29515	2.15136	0.0231723
Bile acid	Glycoursodeoxycholate-3-sulfate	HMDB0002409		[Secondary Bile Acid Metabolism]	528.264	-1.13291	4.98388e-05	0.00363804	207.811	3.65102	0.0274854
Bile acid	Hyodeoxycholic acid	HMDB0000733		[Secondary Bile Acid Metabolism]	391.285	0.169105	0.00195896	0.0676928	40.3364	2.6616	0.0345298
Bile acid	Chenodeoxycholic acid glycine conjugate	HMDB0000637	C05466	[map00120 Primary bile acid biosynthesis]	448.307	-0.46704	0.000551808	0.0245161	9.84911	2.26159	0.0369272
Bile acid	Tauroursodeoxycholic acid	HMDB0000874		[Secondary Bile Acid Metabolism]	498.289	0.50952	5.84894e-05	0.00363804	46.085	2.99259	0.0526782
Bile acid	Chenodeoxycholic acid	HMDB0000518	C02528	[map00120 Primary bile acid biosynthesis]	391.285	1.378	0.013236	0.228689	24.5938	2.13337	0.0858165
Bile acid	Ursocholic acid+Alpha-Muricholic acid+β-Muricholic acid	HMDB0000917+HMDB0000506+HMDB0000415	C17644+C17647+C17726	[map00121 Secondary bile acid biosynthesis]	407.28	-0.14015	0.00160181	0.0622704	31.439	2.71987	0.153927
Exogenous chemical	Pyrocatechol	HMDB0000957	C00090	map00361 Chlorocyclohexane and chlorobenzene degradation	109.029	-2.49281	0.0204412	0.297206	0.527594	1.08468	0.0301641
Fatty acid	Azelaic acid	HMDB0000784	C08261		187.098	1.54931	0.0229355	0.297206	0.448168	1.13384	0.0193616
Organic acid	3-Methyladipic acid	HMDB0000555			159.066	1.56111	0.0295847	0.317271	0.313239	1.18091	0.00703001
Organic acid	Hydroxyisocaproic acid	HMDB0000746			131.071	3.45705	0.00300407	0.0934267	0.140517	1.45595	0.00989033
Organic acid	Pimelic acid	HMDB0000857	C02656	map00780 Biotin metabolism	159.066	2.2326	0.0399177	0.365129	0.280407	1.22023	0.0154548
Other	Pyrocatechol sulfate	HMDB0059724			188.986	0.20447	0.0251307	0.299234	0.564565	1.0014	0.0103706
Peptide	Leu-Leu	HMDB0028933			245.186	-1.6635	0.0346546	0.3368	0.431703	1.58877	0.0710942
Steroid	Pregnanolone sulfate	HMDB0240590		[Pregnane steroid metabolism, Sulfated]	397.205	-0.47655	0.0269407	0.299234	0.40794	1.57554	0.0108611
Steroid	Pregnandiol sulfate (2)			[Pregnane steroid metabolism, Sulfated]	399.221	-0.61321	0.0172727	0.268591	0.376206	1.76718	0.0146873
Steroid	16a-hydroxy DHEA 3-sulfate	HMDB0062544		[Androgen steroid metabolism, Sulfated]	383.153	0.24246	0.0267488	0.299234	0.361133	1.71122	0.020097
Steroid	Pregnanediol monosulfate			[Pregnane steroid metabolism, Sulfated]	399.221	-0.00166	0.0119762	0.219094	0.314712	1.85914	0.0236561
Steroid	5beta-Pregnanediol sulfate			[Pregnane steroid metabolism, Sulfated]	397.205	-0.63021	0.0267506	0.299234	0.227039	1.88117	0.224746
Steroid	Androsterone sulfate (3)			[Androgen steroid metabolism, Sulfated]	369.174	-0.79062	0.00558817	0.147733	0.258576	1.97095	0.0235267
Steroid	Androsterone sulfate (2)			[Androgen steroid metabolism, Sulfated]	369.174	-0.45996	0.00570032	0.147733	0.198474	1.98596	0.0267387
Steroid	Androsterone sulfate (4)			[Androgen steroid metabolism, Sulfated]	369.174	-0.70795	0.0112485	0.218642	0.396835	1.44635	0.0311306
Steroid	Testosterone sulfate (1)	HMDB0002833		[Androgen steroid metabolism, Sulfated]	367.158	0.0212	0.0432713	0.384497	0.466698	1.78861	0.103917
Unannotated	M1X-RT278MZ268				268.133	-2.16536	0.0389027	0.365129	1.17915	0.586547	0.0441815

## Sheet: Placenta
Class	Metabolite	HMDB	KEGG	Metabolic Pathway	Theoretical m/z	m/z accuracy(ppm)	P-value	Q-value	Fold Change	VIP	CV% of QC
Acylcarnitine	Glutarylcarnitine	HMDB0013130			276.144	-0.86586	0.0382529	0.871318	3.50929	1.08719	0.126573
Amino acid	Lenticin	HMDB0061115	C09213	antifungal	247.144	-0.66294	0.0428805	0.871318	0.341319	1.40853	0.081807
Amino acid	Glycosylated-Lys	IPT-NM012		Glycosylated amino acid	309.166	-2.25687	0.0452122	0.871318	1.47608	0.965899	0.050484
Amino acid	Glycosylated-Phe	IPT-NM014		Glycosylated amino acid	328.139	-1.98778	0.0414375	0.871318	2.4709	0.878779	0.050704
Amino acid	Hexanoylglycine	HMDB0000701			172.098	2.76762	0.0219876	0.871318	2.20498	1.21858	0.132764
Amino acid	3-Methylhistidine	HMDB0000479	C01152	map00340 Histidine metabolism	168.078	1.18223	0.017119	0.871318	0.369705	1.85923	0.056896
Benzenoid	Pyrocatechol sulfate	HMDB0059724			188.986	2.54594	0.016043	0.871318	0.446794	1.89886	0.008143
Benzenoid	4-Vinylphenol sulfate	HMDB0062775		Phenolic acid metabolism	199.007	1.07123	0.00957141	0.871318	0.340806	1.62667	0.071676
Bile acid	Glycoursodeoxycholic acid	HMDB0000708			448.307	-0.33089	0.00316505	0.462624	169.957	3.11537	0.03195
Bile acid	Taurocholic acid	HMDB0000036	C05122	map00120 Primary bile acid biosynthesis	514.284	-0.66575	0.0147544	0.871318	8.71249	2.21395	0.019442
Bile acid	Chenodeoxycholic acid glycine conjugate	HMDB0000637	C05466	map00120 Primary bile acid biosynthesis	448.307	-0.092635	0.00103201	0.284351	6.39778	2.29107	0.021774
Bile acid	Taurochenodesoxycholic acid	HMDB0000951	C05465	map00120 Primary bile acid biosynthesis	498.289	-0.164175	0.00491539	0.615828	4.74657	2.2115	0.028565
Bile acid	Glycocholic acid	HMDB0000138	C01921	map00120 Primary bile acid biosynthesis	464.302	-0.892035	0.000575315	0.284351	6.15163	2.061	0.03291
Exogenous chemical	Propylparaben	HMDB0032574			179.071	2.40258	0.0206619	0.871318	1.29261	0.776144	0.119563
Fatty acid	Palmitoleic acid(FFA(16:1)	HMDB0003229	C08362	map00061 Fatty acid biosynthesis	253.217	0.45359	0.049159	0.871318	1.18291	0.396172	0.032064
Fatty acid	7Z,10Z-Hexadecadienoic acid(FFA(16:2)	HMDB0000477			251.202	0.253035	0.00940467	0.871318	1.27609	0.693541	0.182594
Fatty acid	DiHODE (4)			Linoleic acid metabolism	311.223	-0.29957	0.0366559	0.871318	1.48363	0.92603	0.249746
Glycerophosphoethanolamine	PE(32:2e)-PE(16:1e/16:1)			Phosphatidylethanolamine Biosynthesis	672.497	2.38276	0.0481718	0.871318	1.47871	0.836308	0.086162
LysoPC	LysoPC(0:0/14:0)	LMGP01050073		Arachidonic Acid Metabolism,Leukotriene C4 Synthesis Deficiency	468.308	-2.21204	0.0327029	0.871318	1.79782	1.32122	0.036557
LysoPC	LysoPC(14:0/0:0)	HMDB0010379		Arachidonic Acid Metabolism,Leukotriene C4 Synthesis Deficiency	468.308	-2.08171	0.00130579	0.284351	2.20126	1.67215	0.044487
LysoPC	LysoPC(15:0/0:0)	HMDB0010381		map00564 Glycerophospholipid metabolism	482.324	-2.29451	0.0125672	0.871318	2.25137	1.6886	0.042351
LysoPC	LysoPC(0:0/16:1)			map00564 Glycerophospholipid metabolism	494.324	-2.39314	0.00162116	0.284351	4.99504	2.37161	0.172443
LysoPC	LysoPC(16:1/0:0)	HMDB0010383		map00564 Glycerophospholipid metabolism	494.324	-2.39315	0.0208026	0.871318	2.32379	1.81429	0.023284
LysoPC	LysoPC(17:0/0:0)	HMDB0012108		map00564 Glycerophospholipid metabolism	510.355	-0.891125	0.0215441	0.871318	2.49671	1.80457	0.052881
LysoPC	LysoPC(0:0/18:1)	HMDB0061701		map00564 Glycerophospholipid metabolism	522.355	-1.60094	0.0119996	0.871318	2.50565	1.61229	0.12591
LysoPC	LysoPC(18:0/0:0)	HMDB0010384		map00564 Glycerophospholipid metabolism	524.371	-1.00228	0.0485213	0.871318	2.09601	1.4405	0.097283
LysoPC	LysoPC(0:0/20:3)			map00564 Glycerophospholipid metabolism	546.355	-6.11086	0.03694	0.871318	2.17072	1.59082	0.140145
LysoPE	LysoPE(P-16:0/0:0)	HMDB0011152		Phospholipid metabolism	438.298	-1.6075	0.0200058	0.871318	2.41281	1.65812	0.052055
LysoPE	LysoPE(P-18:1/0:0)	HMDB0240599		Phospholipid metabolism	464.314	-1.40696	0.026072	0.871318	3.06666	1.87542	0.063042
LysoPE	LysoPE(P-18:0/0:0)	HMDB0240598		Phospholipid metabolism	466.329	-1.29089	0.0175208	0.871318	2.57089	1.69353	0.094517
LysoPE	LysoPE(0:0/18:1)	HMDB0011476		Phospholipid metabolism	480.308	-1.5214	0.0466142	0.871318	2.94228	1.64397	0.022513
Microbial metabolite	Indole-3-propionic acid	HMDB0002302		catabolite of tryptophan by gut microbiota	190.086	1.19323	0.00154196	0.284351	0.0323181	2.35238	0.186309
Microbial metabolite	p-Cresol sulfate	HMDB0011635			187.007	2.20071	0.0324771	0.871318	0.384886	2.00629	0.02219
Organic acid	DL-2-Aminooctanoic acid	HMDB0000991			160.133	-0.05246	0.0200958	0.871318	0.626775	0.993777	0.026595
Organic acid	Methylmalonic acid	HMDB0000202	C02170	map00240 Pyrimidine metabolism	117.019	3.21935	0.043765	0.871318	0.702299	0.953052	0.020913
Organic acid	Pyruvic acid	HMDB0000243	C00022	map00010 Glycolysis/Gluconeogenesis	87.0088	-1.40309	0.0239028	0.871318	0.603065	1.31197	0.083362
Other	Sulfate	HMDB0001448	C00059	Sulfate/Sulfite Metabolism	96.9601	4.78196	0.0264874	0.871318	0.577466	1.50753	0.006601
Steroid	Testosterone sulfate (1)	HMDB0002833			367.158	-0.47751	0.0341546	0.871318	0.530838	1.74475	0.013928
Steroid	16a-hydroxy DHEA 3-sulfate	HMDB0062544		Androstane steroid metabolism	383.153	0.32211	0.0103496	0.871318	0.441222	1.67157	0.022898
Steroid	Androsterone sulfate (2)			Androgen steroid metabolism	369.174	-0.04664	0.0308383	0.871318	0.591464	1.43129	0.042986
Steroid	Pregnane-diol disulfate	IPT-NM027		Pregnane steroid metabolism	238.077	1.61964	0.0338234	0.871318	0.458553	2.481	0.101467
Steroid	5alpha-Pregnan-3beta,20beta-diol monosulfate(1)	HMDB0240579		Pregnane steroid metabolism	399.221	-0.307435	0.0418414	0.871318	0.473328	1.64872	0.10455
Steroid	Androsterone sulfate (1)			Androgen steroid metabolism	369.174	-0.1293	0.0449164	0.871318	0.372514	1.67099	0.074159
Unannotated	M1X-RT211MZ181				181.072	-0.04989	0.0264948	0.871318	2.1023	1.4053	0.07493
Unannotated	M1X-RT208MZ188				188.071	0.36535	0.0465136	0.871318	0.368909	1.25446	0.194302
Unannotated	M1X-RT550MZ288				288.159	1.17824	0.0463341	0.871318	2.69572	1.62862	0.132152

## Sheet: Serum
Class	Metabolite	HMDB	KEGG	Metabolic Pathway	Theoretical m/z	m/z accuracy(ppm)	P-value	Q-value	Fold Change	VIP	CV% of QC
Acylcarnitine	Succinylcarnitine	HMDB0061717			262.129	-1.86458	0.0277329	0.65483	1.68127	1.3167	0.0488116
Acylcarnitine	Glutarylcarnitine	HMDB0013130			276.144	-1.63945	0.0106889	0.584579	1.97363	1.411	0.0249577
Acylcarnitine	Dodecanoylcarnitine(AcCa(12:0)	HMDB0002250			344.28	-1.5926	0.0385645	0.703934	1.05981	0.349733	0.0136722
Acylcarnitine	Hexadecenoylcarnitine(AcCa(16:1)	HMDB0013207			398.326	-2.40756	0.0456653	0.703934	1.77596	1.01909	0.0606015
Acylcarnitine	Linoleylcarnitine(AcCa(18:2)	HMDB0006469			424.342	-2.53462	0.00559573	0.456851	1.61954	1.30007	0.0128357
Acylcarnitine	Linolenyl carnitine-AcCa(18:3)	HMDB0006318		map01212 Fatty acid metabolism; map00071 Fatty acid degradation	422.326	-5.30569	0.0372947	0.703934	1.71783	1.4454	0.220389
Amino acid	Glycosylated-Ile	IPT-NM008		Glycosylated amino acid	294.155	-2.40616	0.0124339	0.584579	2.00996	1.41271	0.0368618
Amino acid	Glycosylated-Trp	IPT-NM018		Glycosylated amino acid	367.15	-2.622	0.0162128	0.584579	1.60349	1.23036	0.0419517
Amino acid	Hypotaurine	HMDB0000965	C00519	map00430 Taurine and hypotaurine metabolism	108.012	3.21614	0.00919317	0.553042	2.88052	1.92523	0.0624667
Bile acid	Isoursodeoxycholic acid	HMDB0000686	C17662	map00121 Secondary bile acid biosynthesis	391.285	0.52007	0.0359168	0.703934	15.9287	2.79832	0.0380076
Bile acid	Hyodeoxycholic acid	HMDB0000733			391.285	0.67606	0.0111964	0.584579	81.0858	4.19716	0.0337747
Bile acid	Ursocholic acid	HMDB0000917	C17644	map00121 Secondary bile acid biosynthesis	407.28	0.2345	0.000510895	0.0729941	53.3023	4.05661	0.106393
Bile acid	Alpha-Muricholic acid	HMDB0000506			407.28	0.2345	0.0496482	0.703934	5.12931	2.25139	0.0661011
Bile acid	Hyocholic acid	HMDB0000760			407.28	0.68408	0.0241761	0.65483	3.65244	2.03109	0.0759935
Bile acid	Glycoursodeoxycholic acid	HMDB0000708			448.307	0.14562	6.56997e-05	0.0107278	514.672	5.62963	0.0388433
Bile acid	Chenodeoxycholic acid glycine conjugate	HMDB0000637	C05466	map00120 Primary bile acid biosynthesis	448.307	0.00948	1.69155e-05	0.0048336	17.0921	3.91687	0.0274202
Bile acid	Glycohyocholic acid	HMDB0240607		Bile acid metabolism	464.302	-0.66199	1.9738e-07	0.000202628	31.4232	4.15378	0.0345873
Bile acid	Glycocholic acid	HMDB0000138	C01921	map00120 Primary bile acid biosynthesis	464.302	-0.72772	3.54555e-07	0.000202628	50.7625	4.47239	0.0467815
Bile acid	Tauroursodeoxycholic acid	HMDB0000874			498.289	0.44827	5.62328e-05	0.0107123	190.214	5.51681	0.0406395
Bile acid	Taurochenodesoxycholic acid	HMDB0000951	C05465	map00120 Primary bile acid biosynthesis	498.289	0.50952	0.0067694	0.483589	12.5476	3.05575	0.0468861
Bile acid	Taurocholic acid	HMDB0000036	C05122	map00120 Primary bile acid biosynthesis	514.284	-0.54707	3.6417e-05	0.00832494	55.1923	3.99441	0.0385
Bile acid	Glycoursodeoxycholate-3-sulfate	HMDB0002409			528.264	-0.7863	1.58133e-05	0.0048336	371.924	5.38582	0.0251749
Bile acid	Glycochenodeoxycholate-3-sulfate	HMDB0002497			528.264	-0.32414	0.0224951	0.65483	4.71697	2.23515	0.0347179
Diacylglycerol	DG(34:2)-DG(16:1/18:1)	HMDB0007131	C00165	Triacylglycerol Biosynthesis	610.54	0.44466	0.0254157	0.65483	0.688664	1.33147	0.0500441
Diacylglycerol	DG(36:1)-DG(18:0/18:1)	HMDB0007159		Triacylglycerol Biosynthesis	640.587	1.35481	0.0298464	0.668911	0.676048	1.36771	0.0529421
Diacylglycerol	DG(38:4)-DG(18:0/20:4)	HMDB0007170	C00165	Triacylglycerol Biosynthesis	662.572	0.51852	0.031728	0.684247	0.573199	1.21529	0.0723564
Diacylglycerol	DG(38:4)-DG(18:1/20:3)	HMDB0007198		Triacylglycerol Biosynthesis	662.572	0.79487	0.0130714	0.584579	0.698306	1.29496	0.0778527
Exogenous chemical	Iodide	HMDB0012238	C00708	Thyroid hormone synthesis	126.905	3.62028	0.00194533	0.202138	0.151934	3.21701	0.0488111
Exogenous chemical	2-Phenylpropionate	HMDB0011743			149.061	2.08942	0.0441887	0.703934	0.40981	1.39571	0.0697254
Exogenous chemical	Isovanillic acid	HMDB0060003			167.035	2.60813	0.045104	0.703934	0.44198	2.0031	0.0505619
Glycerophosphoethanolamine	PE(36:2)-PE(18:1/18:1)	HMDB0009059		Phosphatidylethanolamine Biosynthesis	744.554	-1.32239	0.0458887	0.703934	0.700893	0.745155	0.0330358
Glycerophosphoethanolamine	PE(36:1)-PE(18:0/18:1)	HMDB0008993		Phosphatidylethanolamine Biosynthesis	746.569	0.36453	0.00476445	0.453813	0.715161	0.966758	0.0373994
Glycerophosphoethanolamine	PE(38:4e)-PE(18:0e/20:4)			Phosphatidylethanolamine Biosynthesis	754.575	0.16698	0.027013	0.65483	0.635847	1.21762	0.0192294
Glycerophosphoinositol	PI(36:1)-PI(18:0/18:1)	HMDB0240667		Phosphatidylinositol Phosphate Metabolism	863.566	0.41333	0.0091166	0.553042	0.73014	1.15406	0.0175677
LysoPE	LysoPE(0:0/18:2)	HMDB0011477		Phospholipid metabolism	478.293	-1.92218	0.0476957	0.703934	0.737686	0.726898	0.022788
LysoPE	LysoPE(18:2/0:0)	HMDB0011507		Lipid metabolism	478.293	-1.60315	0.026759	0.65483	0.644096	0.965681	0.0305328
LysoPE	LysoPE(18:1)	HMDB0011505		map00564 Glycerophospholipid metabolism	480.308	1.0201	0.0230492	0.65483	0.612368	0.924363	0.0586966
Organic acid	Caproic acid	HMDB0000535	C01585		115.076	4.41187	0.0165768	0.584579	2.46356	2.27939	0.166952
Peptide	gamma-Glu-Ala	HMDB0006248	C03740		219.098	-0.55971	0.043509	0.703934	2.20138	1.4328	0.0584661
Peptide	Tyr-Glu	HMDB0029104			311.124	-2.58636	0.00616038	0.469421	0.428853	1.82128	0.0503104
Peptide	Fibrinopeptide B residual [1-9]			Fibrinogen oligopeptide degradation	472.683	-1.18849	0.0160683	0.584579	1.81995	1.33711	0.0323313
Peptide	gamma-Glu-Gly	HMDB0011667			203.067	5.24531	0.0251323	0.65483	1.51306	1.06659	0.0556555
Purine&Pyrimidine	5'-Methylthioadenosine	HMDB0001173	C00170	map00270 Cysteine and methionine metabolism	298.097	-2.38053	0.0280723	0.65483	27.6726	2.38747	0.0626184
Purine&Pyrimidine	5-Methyluridine	HMDB0000884		endogenous methylated nucleoside	257.078	0.24278	0.0168776	0.584579	1.22141	0.742061	0.0602798
Sphingoid base	Sphingosine 1-phosphate	HMDB0000277	C06124	map00600 Sphingolipid metabolism	380.256	-2.32088	0.00176707	0.202138	1.91412	1.69602	0.055275
Sphingoid base	Sphinganine 1-phosphate	HMDB0001383	C01120	map00600 Sphingolipid metabolism	382.272	-3.33203	0.00178203	0.202138	1.69357	1.54415	0.0323566
Steroid	Androsterone sulfate (4)			Androgen steroid metabolism	369.174	-0.21196	0.0279231	0.65483	0.548139	1.32789	0.0450459
Steroid	Pregnane steroid sulfate (2)			progesterone metabolism	397.205	-0.09239	0.0261424	0.65483	0.473821	1.76257	0.0324761
Steroid	3 beta-Hydroxy-5-cholestenoate	HMDB0012453	C17333		415.322	-0.42319	0.0152861	0.584579	0.634038	1.10397	0.0558746
Triacylglycerol	TG(62:10)-TG(22:4/18:2/22:4)	HMDB0054775		Triglyceride metabolism	1000.83	2.06715	0.0306199	0.673049	0.468617	1.32855	0.0610957
Triacylglycerol	TG(62:2)-TG(16:0/22:2/24:0)	HMDB0044393		Triglyceride metabolism	1016.96	1.65765	0.0261403	0.65483	0.545847	1.2867	0.0153718
Triacylglycerol	TG(62:1)-TG(20:0/18:0/24:1)	HMDB0045565		Triglyceride metabolism	1018.97	1.62984	0.0458324	0.703934	0.497862	1.24729	0.0441565
Triacylglycerol	TG(54:2)-TG(18:0/18:1/18:1)	HMDB0005403	C00422	map00561 Glycerolipid metabolism	904.833	-1.35609	0.0270394	0.65483	0.659065	1.12447	0.0615347
Triacylglycerol	TG(54:1)-TG(18:0/18:0/18:1)	HMDB0005395	C00422	map00561 Glycerolipid metabolism	906.848	1.04233	0.0324877	0.687657	0.611958	1.26649	0.031966
Triacylglycerol	TG(56:4)-TG(18:0/18:0/20:4)	HMDB0044771		Triglyceride metabolism	928.833	-0.92678	0.0401488	0.703934	0.53324	1.32852	0.0214369
Triacylglycerol	TG(56:3)-TG(18:1/18:1/20:1)	HMDB0049263		Triglyceride metabolism	930.848	-1.60732	0.0345947	0.703934	0.641548	1.07145	0.0704269
Triacylglycerol	TG(56:1)-TG(16:0/18:1/22:0)	HMDB0044112		Triglyceride metabolism	934.88	1.74103	0.0155595	0.584579	0.504656	1.50629	0.0360756
Triacylglycerol	TG(58:1)-TG(16:0/18:1/24:0)	HMDB0044113		Triglyceride metabolism	962.911	1.89197	0.0270266	0.65483	0.518289	1.42395	0.0327246
Triacylglycerol	TG(60:2)-TG(18:1/18:1/24:0)mixture	HMDB0049199		Triglyceride metabolism	988.927	1.94035	0.0393484	0.703934	0.572602	1.21274	0.0200028
Triacylglycerol	TG(60:1)-TG(18:0/18:1/24:0)	HMDB0044941		Triglyceride metabolism	990.942	1.97277	0.0156646	0.584579	0.518768	1.40156	0.00511985
Unannotated	M1X-RT188MZ160				160.097	-0.39987	0.0289054	0.660778	1.78447	1.05971	0.199211
Unannotated	M1X-RT330MZ169				169.05	-0.05898	0.045348	0.703934	0.446831	2.0142	0.00417672
Unannotated	M1X-RT277MZ267				267.124	8.04939	0.0178706	0.600767	1.106	0.471128	0.0192251
Unannotated	M1X-RT277MZ268				268.133	-3.07588	0.0240508	0.65483	1.08724	0.491939	0.0303801
Unannotated	M1X-RT84MZ295				295.155	7.21892	0.00897336	0.553042	2.0662	1.47314	0.0307841
Unannotated	M2X-RT171MZ00				200.029	6.04303	0.0431393	0.703934	1.08811	0.335743	0.0333817
Unannotated	M2X-RT100MZ205				205.065	-3.76278	0.0125803	0.584579	1.12152	0.450338	0.0284566
Unannotated	M2X-RT598MZ233				233.155	0.62701	0.0127912	0.584579	0.866925	0.65098	0.0469344
Unannotated	M2X-RT256MZ266				266.018	-1.02848	0.0446723	0.703934	1.94643	1.40895	0.0477814
Unannotated	M3X-RT51MZ233				233.155	-0.15832	0.0137873	0.584579	0.615628	1.15512	0.0732134
Unannotated	M3X-RT58MZ239				239.13	-5.23863	0.00518545	0.455921	0.293926	1.75697	0.046662
Ceramide	Cer(d42:0)-Cer(d18:0/24:0)	HMDB0011768		map00600 Sphingolipid metabolism	652.66	2.47405	0.037246	0.703934	0.611471	1.40161	0.362228
Peptide	gamma-Glu-Met	HMDB0034367			279.101	-1.63429	0.0459368	0.703934	2.93452	1.67264	0.390007
