# Supplementary material for: The complete change in bile acids and steroids in systematic metabolomics applied to the intrahepatic cholestasis of pregnancy
Source: Royal Society of Chemistry journal article supplement (doi:10.1039/d2mo00305h), 2023-03-31
Supplement: d2mo00305h24.xlsx [file d2mo00305h24.xlsx]

## Sheet: Urine
Class	Metabolite	HMDB	KEGG	Metabolic Pathway	Theoretical m/z	m/z accuracy(ppm)	P-value	Q-value	Fold Change	VIP
Amino acid	N1-Acetylspermidine	HMDB0001276	C00612		188.176	2.40859	0.0148245	0.242653	1.68742	1.1866
Amino acid	Tryptamine	HMDB0000303	C00398	map00380 Tryptophan metabolism	144.081	-0.21161	0.0323306	0.335161	1.86164	1.15092
Amino acid	N6,N6,N6-Trimethyl-L-lysine	HMDB0001325	C03793	map00310 Lysine degradation	189.16	-0.353	0.00968227	0.20832	1.6888	0.969427
Amino acid	Phenylacetylglycine	HMDB0000821	C05598	map00360 Phenylalanine metabolism	192.067	1.19102	0.0211002	0.297206	0.0537121	1.79787
Amino acid	(R)-2,3-Dihydroxy-isovalerate	HMDB0012141	C04272	map00290 Valine, leucine and isoleucine biosynthesis	133.051	2.85705	0.0471521	0.407341	4.78676	1.30011
Amino acid	Pyroglutamic acid	HMDB0000267	C01879	map00480 Glutathione metabolism	128.035	1.93882	0.033798	0.3368	1.59533	1.03651
Bile acid	Glycochenodeoxycholate-3-sulfate	HMDB0002497		[Secondary Bile Acid Metabolism]	528.264	-0.67076	0.0227855	0.297206	2.8697	1.59451
Bile acid	Taurocholic acid	HMDB0000036	C05122	[map00120 Primary bile acid biosynthesis]	514.284	-0.66575	2.37202e-05	0.002459	13.3016	2.20555
Bile acid	Taurochenodesoxycholic acid	HMDB0000951	C05465	[map00120 Primary bile acid biosynthesis]	498.289	-0.10293	0.0100476	0.20832	6.33642	1.54089
Bile acid	Glycohyocholic acid	HMDB0240607		[Bile acid metabolism]	464.302	-0.66199	1.93326e-05	0.002459	11.4126	2.69324
Bile acid	Glycoursodeoxycholic acid	HMDB0000708		[Secondary Bile Acid Metabolism]	448.307	-0.53511	7.14733e-05	0.0037047	125.891	3.49298
Bile acid	Glycocholic acid	HMDB0000138	C01921	[map00120 Primary bile acid biosynthesis]	464.302	-1.64791	1.79355e-05	0.002459	11.7274	2.61116
Bile acid	Cholic acid	HMDB0000619	C00695	[map00120 Primary bile acid biosynthesis]	407.28	-0.66466	0.00685393	0.163967	4.29515	2.15136
Bile acid	Glycoursodeoxycholate-3-sulfate	HMDB0002409		[Secondary Bile Acid Metabolism]	528.264	-1.13291	4.98388e-05	0.00363804	207.811	3.65102
Bile acid	Hyodeoxycholic acid	HMDB0000733		[Secondary Bile Acid Metabolism]	391.285	0.169105	0.00195896	0.0676928	40.3364	2.6616
Bile acid	Chenodeoxycholic acid glycine conjugate	HMDB0000637	C05466	[map00120 Primary bile acid biosynthesis]	448.307	-0.46704	0.000551808	0.0245161	9.84911	2.26159
Bile acid	Tauroursodeoxycholic acid	HMDB0000874		[Secondary Bile Acid Metabolism]	498.289	0.50952	5.84894e-05	0.00363804	46.085	2.99259
Bile acid	Chenodeoxycholic acid	HMDB0000518	C02528	[map00120 Primary bile acid biosynthesis]	391.285	1.378	0.013236	0.228689	24.5938	2.13337
Bile acid	Ursocholic acid+Alpha-Muricholic acid+β-Muricholic acid	HMDB0000917+HMDB0000506+HMDB0000415	C17644+C17647+C17726	[map00121 Secondary bile acid biosynthesis]	407.28	-0.14015	0.00160181	0.0622704	31.439	2.71987
Exogenous chemical	Pyrocatechol	HMDB0000957	C00090	map00361 Chlorocyclohexane and chlorobenzene degradation	109.029	-2.49281	0.0204412	0.297206	0.527594	1.08468
Fatty acid	Azelaic acid	HMDB0000784	C08261		187.098	1.54931	0.0229355	0.297206	0.448168	1.13384
Organic acid	3-Methyladipic acid	HMDB0000555			159.066	1.56111	0.0295847	0.317271	0.313239	1.18091
Organic acid	Hydroxyisocaproic acid	HMDB0000746			131.071	3.45705	0.00300407	0.0934267	0.140517	1.45595
Organic acid	Pimelic acid	HMDB0000857	C02656	map00780 Biotin metabolism	159.066	2.2326	0.0399177	0.365129	0.280407	1.22023
Other	Pyrocatechol sulfate	HMDB0059724			188.986	0.20447	0.0251307	0.299234	0.564565	1.0014
Peptide	Leu-Leu	HMDB0028933			245.186	-1.6635	0.0346546	0.3368	0.431703	1.58877
Steroid	Pregnanolone sulfate	HMDB0240590		[Pregnane steroid metabolism, Sulfated]	397.205	-0.47655	0.0269407	0.299234	0.40794	1.57554
Steroid	Pregnandiol sulfate (2)			[Pregnane steroid metabolism, Sulfated]	399.221	-0.61321	0.0172727	0.268591	0.376206	1.76718
Steroid	16a-hydroxy DHEA 3-sulfate	HMDB0062544		[Androgen steroid metabolism, Sulfated]	383.153	0.24246	0.0267488	0.299234	0.361133	1.71122
Steroid	Pregnanediol monosulfate			[Pregnane steroid metabolism, Sulfated]	399.221	-0.00166	0.0119762	0.219094	0.314712	1.85914
Steroid	5beta-Pregnanediol sulfate			[Pregnane steroid metabolism, Sulfated]	397.205	-0.63021	0.0267506	0.299234	0.227039	1.88117
Steroid	Androsterone sulfate (3)			[Androgen steroid metabolism, Sulfated]	369.174	-0.79062	0.00558817	0.147733	0.258576	1.97095
Steroid	Androsterone sulfate (2)			[Androgen steroid metabolism, Sulfated]	369.174	-0.45996	0.00570032	0.147733	0.198474	1.98596
Steroid	Androsterone sulfate (4)			[Androgen steroid metabolism, Sulfated]	369.174	-0.70795	0.0112485	0.218642	0.396835	1.44635
Steroid	Testosterone sulfate (1)	HMDB0002833		[Androgen steroid metabolism, Sulfated]	367.158	0.0212	0.0432713	0.384497	0.466698	1.78861
Unannotated	M1X-RT278MZ268				268.133	-2.16536	0.0389027	0.365129	1.17915	0.586547

## Sheet: Placenta
Class	Metabolite	HMDB	KEGG	Metabolic Pathway	Theoretical m/z	m/z accuracy(ppm)	P-value	Q-value	Fold Change	VIP
Acylcarnitine	Glutarylcarnitine	HMDB0013130			276.144	-0.86586	0.0382529	0.871318	3.50929	1.08719
Amino acid	Lenticin	HMDB0061115	C09213	antifungal	247.144	-0.66294	0.0428805	0.871318	0.341319	1.40853
Amino acid	Glycosylated-Lys	IPT-NM012		Glycosylated amino acid	309.166	-2.25687	0.0452122	0.871318	1.47608	0.965899
Amino acid	Glycosylated-Phe	IPT-NM014		Glycosylated amino acid	328.139	-1.98778	0.0414375	0.871318	2.4709	0.878779
Amino acid	Hexanoylglycine	HMDB0000701			172.098	2.76762	0.0219876	0.871318	2.20498	1.21858
Amino acid	3-Methylhistidine	HMDB0000479	C01152	map00340 Histidine metabolism	168.078	1.18223	0.017119	0.871318	0.369705	1.85923
Benzenoid	Pyrocatechol sulfate	HMDB0059724			188.986	2.54594	0.016043	0.871318	0.446794	1.89886
Benzenoid	4-Vinylphenol sulfate	HMDB0062775		Phenolic acid metabolism	199.007	1.07123	0.00957141	0.871318	0.340806	1.62667
Bile acid	Glycoursodeoxycholic acid	HMDB0000708			448.307	-0.33089	0.00316505	0.462624	169.957	3.11537
Bile acid	Taurocholic acid	HMDB0000036	C05122	map00120 Primary bile acid biosynthesis	514.284	-0.66575	0.0147544	0.871318	8.71249	2.21395
Bile acid	Chenodeoxycholic acid glycine conjugate	HMDB0000637	C05466	map00120 Primary bile acid biosynthesis	448.307	-0.092635	0.00103201	0.284351	6.39778	2.29107
Bile acid	Taurochenodesoxycholic acid	HMDB0000951	C05465	map00120 Primary bile acid biosynthesis	498.289	-0.164175	0.00491539	0.615828	4.74657	2.2115
Bile acid	Glycocholic acid	HMDB0000138	C01921	map00120 Primary bile acid biosynthesis	464.302	-0.892035	0.000575315	0.284351	6.15163	2.061
Exogenous chemical	Propylparaben	HMDB0032574			179.071	2.40258	0.0206619	0.871318	1.29261	0.776144
Fatty acid	Palmitoleic acid(FFA(16:1)	HMDB0003229	C08362	map00061 Fatty acid biosynthesis	253.217	0.45359	0.049159	0.871318	1.18291	0.396172
Fatty acid	7Z,10Z-Hexadecadienoic acid(FFA(16:2)	HMDB0000477			251.202	0.253035	0.00940467	0.871318	1.27609	0.693541
Fatty acid	DiHODE (4)			Linoleic acid metabolism	311.223	-0.29957	0.0366559	0.871318	1.48363	0.92603
Glycerophosphoethanolamine	PE(32:2e)-PE(16:1e/16:1)			Phosphatidylethanolamine Biosynthesis	672.497	2.38276	0.0481718	0.871318	1.47871	0.836308
LysoPC	LysoPC(0:0/14:0)	LMGP01050073		Arachidonic Acid Metabolism,Leukotriene C4 Synthesis Deficiency	468.308	-2.21204	0.0327029	0.871318	1.79782	1.32122
LysoPC	LysoPC(14:0/0:0)	HMDB0010379		Arachidonic Acid Metabolism,Leukotriene C4 Synthesis Deficiency	468.308	-2.08171	0.00130579	0.284351	2.20126	1.67215
LysoPC	LysoPC(15:0/0:0)	HMDB0010381		map00564 Glycerophospholipid metabolism	482.324	-2.29451	0.0125672	0.871318	2.25137	1.6886
LysoPC	LysoPC(0:0/16:1)			map00564 Glycerophospholipid metabolism	494.324	-2.39314	0.00162116	0.284351	4.99504	2.37161
LysoPC	LysoPC(16:1/0:0)	HMDB0010383		map00564 Glycerophospholipid metabolism	494.324	-2.39315	0.0208026	0.871318	2.32379	1.81429
LysoPC	LysoPC(17:0/0:0)	HMDB0012108		map00564 Glycerophospholipid metabolism	510.355	-0.891125	0.0215441	0.871318	2.49671	1.80457
LysoPC	LysoPC(0:0/18:1)	HMDB0061701		map00564 Glycerophospholipid metabolism	522.355	-1.60094	0.0119996	0.871318	2.50565	1.61229
LysoPC	LysoPC(18:0/0:0)	HMDB0010384		map00564 Glycerophospholipid metabolism	524.371	-1.00228	0.0485213	0.871318	2.09601	1.4405
LysoPC	LysoPC(0:0/20:3)			map00564 Glycerophospholipid metabolism	546.355	-6.11086	0.03694	0.871318	2.17072	1.59082
LysoPE	LysoPE(P-16:0/0:0)	HMDB0011152		Phospholipid metabolism	438.298	-1.6075	0.0200058	0.871318	2.41281	1.65812
LysoPE	LysoPE(P-18:1/0:0)	HMDB0240599		Phospholipid metabolism	464.314	-1.40696	0.026072	0.871318	3.06666	1.87542
LysoPE	LysoPE(P-18:0/0:0)	HMDB0240598		Phospholipid metabolism	466.329	-1.29089	0.0175208	0.871318	2.57089	1.69353
LysoPE	LysoPE(0:0/18:1)	HMDB0011476		Phospholipid metabolism	480.308	-1.5214	0.0466142	0.871318	2.94228	1.64397
Microbial metabolite	Indole-3-propionic acid	HMDB0002302		catabolite of tryptophan by gut microbiota	190.086	1.19323	0.00154196	0.284351	0.0323181	2.35238
Microbial metabolite	p-Cresol sulfate	HMDB0011635			187.007	2.20071	0.0324771	0.871318	0.384886	2.00629
Organic acid	DL-2-Aminooctanoic acid	HMDB0000991			160.133	-0.05246	0.0200958	0.871318	0.626775	0.993777
Organic acid	Methylmalonic acid	HMDB0000202	C02170	map00240 Pyrimidine metabolism	117.019	3.21935	0.043765	0.871318	0.702299	0.953052
Organic acid	Pyruvic acid	HMDB0000243	C00022	map00010 Glycolysis/Gluconeogenesis	87.0088	-1.40309	0.0239028	0.871318	0.603065	1.31197
Other	Sulfate	HMDB0001448	C00059	Sulfate/Sulfite Metabolism	96.9601	4.78196	0.0264874	0.871318	0.577466	1.50753
Steroid	Testosterone sulfate (1)	HMDB0002833			367.158	-0.47751	0.0341546	0.871318	0.530838	1.74475
Steroid	16a-hydroxy DHEA 3-sulfate	HMDB0062544		Androstane steroid metabolism	383.153	0.32211	0.0103496	0.871318	0.441222	1.67157
Steroid	Androsterone sulfate (2)			Androgen steroid metabolism	369.174	-0.04664	0.0308383	0.871318	0.591464	1.43129
Steroid	Pregnane-diol disulfate	IPT-NM027		Pregnane steroid metabolism	238.077	1.61964	0.0338234	0.871318	0.458553	2.481
Steroid	5alpha-Pregnan-3beta,20beta-diol monosulfate(1)	HMDB0240579		Pregnane steroid metabolism	399.221	-0.307435	0.0418414	0.871318	0.473328	1.64872
Steroid	Androsterone sulfate (1)			Androgen steroid metabolism	369.174	-0.1293	0.0449164	0.871318	0.372514	1.67099
Unannotated	M1X-RT211MZ181				181.072	-0.04989	0.0264948	0.871318	2.1023	1.4053
Unannotated	M1X-RT208MZ188				188.071	0.36535	0.0465136	0.871318	0.368909	1.25446
Unannotated	M1X-RT550MZ288				288.159	1.17824	0.0463341	0.871318	2.69572	1.62862

## Sheet: Serum
Class	Metabolite	HMDB	KEGG	Metabolic Pathway	Theoretical m/z	m/z accuracy(ppm)	P-value	Q-value	Fold Change	VIP
Acylcarnitine	Succinylcarnitine	HMDB0061717			262.129	-1.86458	0.0277329	0.65483	1.68127	1.3167
Acylcarnitine	Glutarylcarnitine	HMDB0013130			276.144	-1.63945	0.0106889	0.584579	1.97363	1.411
Acylcarnitine	Dodecanoylcarnitine(AcCa(12:0)	HMDB0002250			344.28	-1.5926	0.0385645	0.703934	1.05981	0.349733
Acylcarnitine	Hexadecenoylcarnitine(AcCa(16:1)	HMDB0013207			398.326	-2.40756	0.0456653	0.703934	1.77596	1.01909
Acylcarnitine	Linoleylcarnitine(AcCa(18:2)	HMDB0006469			424.342	-2.53462	0.00559573	0.456851	1.61954	1.30007
Acylcarnitine	Linolenyl carnitine-AcCa(18:3)	HMDB0006318		map01212 Fatty acid metabolism; map00071 Fatty acid degradation	422.326	-5.30569	0.0372947	0.703934	1.71783	1.4454
Amino acid	Glycosylated-Ile	IPT-NM008		Glycosylated amino acid	294.155	-2.40616	0.0124339	0.584579	2.00996	1.41271
Amino acid	Glycosylated-Trp	IPT-NM018		Glycosylated amino acid	367.15	-2.622	0.0162128	0.584579	1.60349	1.23036
Amino acid	Hypotaurine	HMDB0000965	C00519	map00430 Taurine and hypotaurine metabolism	108.012	3.21614	0.00919317	0.553042	2.88052	1.92523
Bile acid	Isoursodeoxycholic acid	HMDB0000686	C17662	map00121 Secondary bile acid biosynthesis	391.285	0.52007	0.0359168	0.703934	15.9287	2.79832
Bile acid	Hyodeoxycholic acid	HMDB0000733			391.285	0.67606	0.0111964	0.584579	81.0858	4.19716
Bile acid	Ursocholic acid	HMDB0000917	C17644	map00121 Secondary bile acid biosynthesis	407.28	0.2345	0.000510895	0.0729941	53.3023	4.05661
Bile acid	Alpha-Muricholic acid	HMDB0000506			407.28	0.2345	0.0496482	0.703934	5.12931	2.25139
Bile acid	Hyocholic acid	HMDB0000760			407.28	0.68408	0.0241761	0.65483	3.65244	2.03109
Bile acid	Glycoursodeoxycholic acid	HMDB0000708			448.307	0.14562	6.56997e-05	0.0107278	514.672	5.62963
Bile acid	Chenodeoxycholic acid glycine conjugate	HMDB0000637	C05466	map00120 Primary bile acid biosynthesis	448.307	0.00948	1.69155e-05	0.0048336	17.0921	3.91687
Bile acid	Glycohyocholic acid	HMDB0240607		Bile acid metabolism	464.302	-0.66199	1.9738e-07	0.000202628	31.4232	4.15378
Bile acid	Glycocholic acid	HMDB0000138	C01921	map00120 Primary bile acid biosynthesis	464.302	-0.72772	3.54555e-07	0.000202628	50.7625	4.47239
Bile acid	Tauroursodeoxycholic acid	HMDB0000874			498.289	0.44827	5.62328e-05	0.0107123	190.214	5.51681
Bile acid	Taurochenodesoxycholic acid	HMDB0000951	C05465	map00120 Primary bile acid biosynthesis	498.289	0.50952	0.0067694	0.483589	12.5476	3.05575
Bile acid	Taurocholic acid	HMDB0000036	C05122	map00120 Primary bile acid biosynthesis	514.284	-0.54707	3.6417e-05	0.00832494	55.1923	3.99441
Bile acid	Glycoursodeoxycholate-3-sulfate	HMDB0002409			528.264	-0.7863	1.58133e-05	0.0048336	371.924	5.38582
Bile acid	Glycochenodeoxycholate-3-sulfate	HMDB0002497			528.264	-0.32414	0.0224951	0.65483	4.71697	2.23515
Ceramide	Cer(d42:0)-Cer(d18:0/24:0)	HMDB0011768		map00600 Sphingolipid metabolism	652.66	2.47405	0.037246	0.703934	0.611471	1.40161
Diacylglycerol	DG(34:2)-DG(16:1/18:1)	HMDB0007131	C00165	Triacylglycerol Biosynthesis	610.54	0.44466	0.0254157	0.65483	0.688664	1.33147
Diacylglycerol	DG(36:1)-DG(18:0/18:1)	HMDB0007159		Triacylglycerol Biosynthesis	640.587	1.35481	0.0298464	0.668911	0.676048	1.36771
Diacylglycerol	DG(38:4)-DG(18:0/20:4)	HMDB0007170	C00165	Triacylglycerol Biosynthesis	662.572	0.51852	0.031728	0.684247	0.573199	1.21529
Diacylglycerol	DG(38:4)-DG(18:1/20:3)	HMDB0007198		Triacylglycerol Biosynthesis	662.572	0.79487	0.0130714	0.584579	0.698306	1.29496
Exogenous chemical	Iodide	HMDB0012238	C00708	Thyroid hormone synthesis	126.905	3.62028	0.00194533	0.202138	0.151934	3.21701
Exogenous chemical	2-Phenylpropionate	HMDB0011743			149.061	2.08942	0.0441887	0.703934	0.40981	1.39571
Exogenous chemical	Isovanillic acid	HMDB0060003			167.035	2.60813	0.045104	0.703934	0.44198	2.0031
Glycerophosphoethanolamine	PE(36:2)-PE(18:1/18:1)	HMDB0009059		Phosphatidylethanolamine Biosynthesis	744.554	-1.32239	0.0458887	0.703934	0.700893	0.745155
Glycerophosphoethanolamine	PE(36:1)-PE(18:0/18:1)	HMDB0008993		Phosphatidylethanolamine Biosynthesis	746.569	0.36453	0.00476445	0.453813	0.715161	0.966758
Glycerophosphoethanolamine	PE(38:4e)-PE(18:0e/20:4)			Phosphatidylethanolamine Biosynthesis	754.575	0.16698	0.027013	0.65483	0.635847	1.21762
Glycerophosphoinositol	PI(36:1)-PI(18:0/18:1)	HMDB0240667		Phosphatidylinositol Phosphate Metabolism	863.566	0.41333	0.0091166	0.553042	0.73014	1.15406
LysoPE	LysoPE(0:0/18:2)	HMDB0011477		Phospholipid metabolism	478.293	-1.92218	0.0476957	0.703934	0.737686	0.726898
LysoPE	LysoPE(18:2/0:0)	HMDB0011507		Lipid metabolism	478.293	-1.60315	0.026759	0.65483	0.644096	0.965681
LysoPE	LysoPE(18:1)	HMDB0011505		map00564 Glycerophospholipid metabolism	480.308	1.0201	0.0230492	0.65483	0.612368	0.924363
Organic acid	Caproic acid	HMDB0000535	C01585		115.076	4.41187	0.0165768	0.584579	2.46356	2.27939
Peptide	gamma-Glu-Ala	HMDB0006248	C03740		219.098	-0.55971	0.043509	0.703934	2.20138	1.4328
Peptide	gamma-Glu-Met	HMDB0034367			279.101	-1.63429	0.0459368	0.703934	2.93452	1.67264
Peptide	Tyr-Glu	HMDB0029104			311.124	-2.58636	0.00616038	0.469421	0.428853	1.82128
Peptide	Fibrinopeptide B residual [1-9]			Fibrinogen oligopeptide degradation	472.683	-1.18849	0.0160683	0.584579	1.81995	1.33711
Peptide	gamma-Glu-Gly	HMDB0011667			203.067	5.24531	0.0251323	0.65483	1.51306	1.06659
Purine&Pyrimidine	5'-Methylthioadenosine	HMDB0001173	C00170	map00270 Cysteine and methionine metabolism	298.097	-2.38053	0.0280723	0.65483	27.6726	2.38747
Purine&Pyrimidine	5-Methyluridine	HMDB0000884		endogenous methylated nucleoside	257.078	0.24278	0.0168776	0.584579	1.22141	0.742061
Sphingoid base	Sphingosine 1-phosphate	HMDB0000277	C06124	map00600 Sphingolipid metabolism	380.256	-2.32088	0.00176707	0.202138	1.91412	1.69602
Sphingoid base	Sphinganine 1-phosphate	HMDB0001383	C01120	map00600 Sphingolipid metabolism	382.272	-3.33203	0.00178203	0.202138	1.69357	1.54415
Steroid	Androsterone sulfate (4)			Androgen steroid metabolism	369.174	-0.21196	0.0279231	0.65483	0.548139	1.32789
Steroid	Pregnane steroid sulfate (2)			progesterone metabolism	397.205	-0.09239	0.0261424	0.65483	0.473821	1.76257
Steroid	3 beta-Hydroxy-5-cholestenoate	HMDB0012453	C17333		415.322	-0.42319	0.0152861	0.584579	0.634038	1.10397
Triacylglycerol	TG(62:10)-TG(22:4/18:2/22:4)	HMDB0054775		Triglyceride metabolism	1000.83	2.06715	0.0306199	0.673049	0.468617	1.32855
Triacylglycerol	TG(62:2)-TG(16:0/22:2/24:0)	HMDB0044393		Triglyceride metabolism	1016.96	1.65765	0.0261403	0.65483	0.545847	1.2867
Triacylglycerol	TG(62:1)-TG(20:0/18:0/24:1)	HMDB0045565		Triglyceride metabolism	1018.97	1.62984	0.0458324	0.703934	0.497862	1.24729
Triacylglycerol	TG(54:2)-TG(18:0/18:1/18:1)	HMDB0005403	C00422	map00561 Glycerolipid metabolism	904.833	-1.35609	0.0270394	0.65483	0.659065	1.12447
Triacylglycerol	TG(54:1)-TG(18:0/18:0/18:1)	HMDB0005395	C00422	map00561 Glycerolipid metabolism	906.848	1.04233	0.0324877	0.687657	0.611958	1.26649
Triacylglycerol	TG(56:4)-TG(18:0/18:0/20:4)	HMDB0044771		Triglyceride metabolism	928.833	-0.92678	0.0401488	0.703934	0.53324	1.32852
Triacylglycerol	TG(56:3)-TG(18:1/18:1/20:1)	HMDB0049263		Triglyceride metabolism	930.848	-1.60732	0.0345947	0.703934	0.641548	1.07145
Triacylglycerol	TG(56:1)-TG(16:0/18:1/22:0)	HMDB0044112		Triglyceride metabolism	934.88	1.74103	0.0155595	0.584579	0.504656	1.50629
Triacylglycerol	TG(58:1)-TG(16:0/18:1/24:0)	HMDB0044113		Triglyceride metabolism	962.911	1.89197	0.0270266	0.65483	0.518289	1.42395
Triacylglycerol	TG(60:2)-TG(18:1/18:1/24:0)mixture	HMDB0049199		Triglyceride metabolism	988.927	1.94035	0.0393484	0.703934	0.572602	1.21274
Triacylglycerol	TG(60:1)-TG(18:0/18:1/24:0)	HMDB0044941		Triglyceride metabolism	990.942	1.97277	0.0156646	0.584579	0.518768	1.40156
Unannotated	M1X-RT188MZ160				160.097	-0.39987	0.0289054	0.660778	1.78447	1.05971
Unannotated	M1X-RT330MZ169				169.05	-0.05898	0.045348	0.703934	0.446831	2.0142
Unannotated	M1X-RT277MZ267				267.124	8.04939	0.0178706	0.600767	1.106	0.471128
Unannotated	M1X-RT277MZ268				268.133	-3.07588	0.0240508	0.65483	1.08724	0.491939
Unannotated	M1X-RT84MZ295				295.155	7.21892	0.00897336	0.553042	2.0662	1.47314
Unannotated	M2X-RT171MZ00				200.029	6.04303	0.0431393	0.703934	1.08811	0.335743
Unannotated	M2X-RT100MZ205				205.065	-3.76278	0.0125803	0.584579	1.12152	0.450338
Unannotated	M2X-RT598MZ233				233.155	0.62701	0.0127912	0.584579	0.866925	0.65098
Unannotated	M2X-RT256MZ266				266.018	-1.02848	0.0446723	0.703934	1.94643	1.40895
Unannotated	M3X-RT51MZ233				233.155	-0.15832	0.0137873	0.584579	0.615628	1.15512
Unannotated	M3X-RT58MZ239				239.13	-5.23863	0.00518545	0.455921	0.293926	1.75697
