# Supplementary figures and images for: The complete change in bile acids and steroids in systematic metabolomics applied to the intrahepatic cholestasis of pregnancy
Source: Royal Society of Chemistry journal article supplement (doi:10.1039/d2mo00305h), 2023-03-31

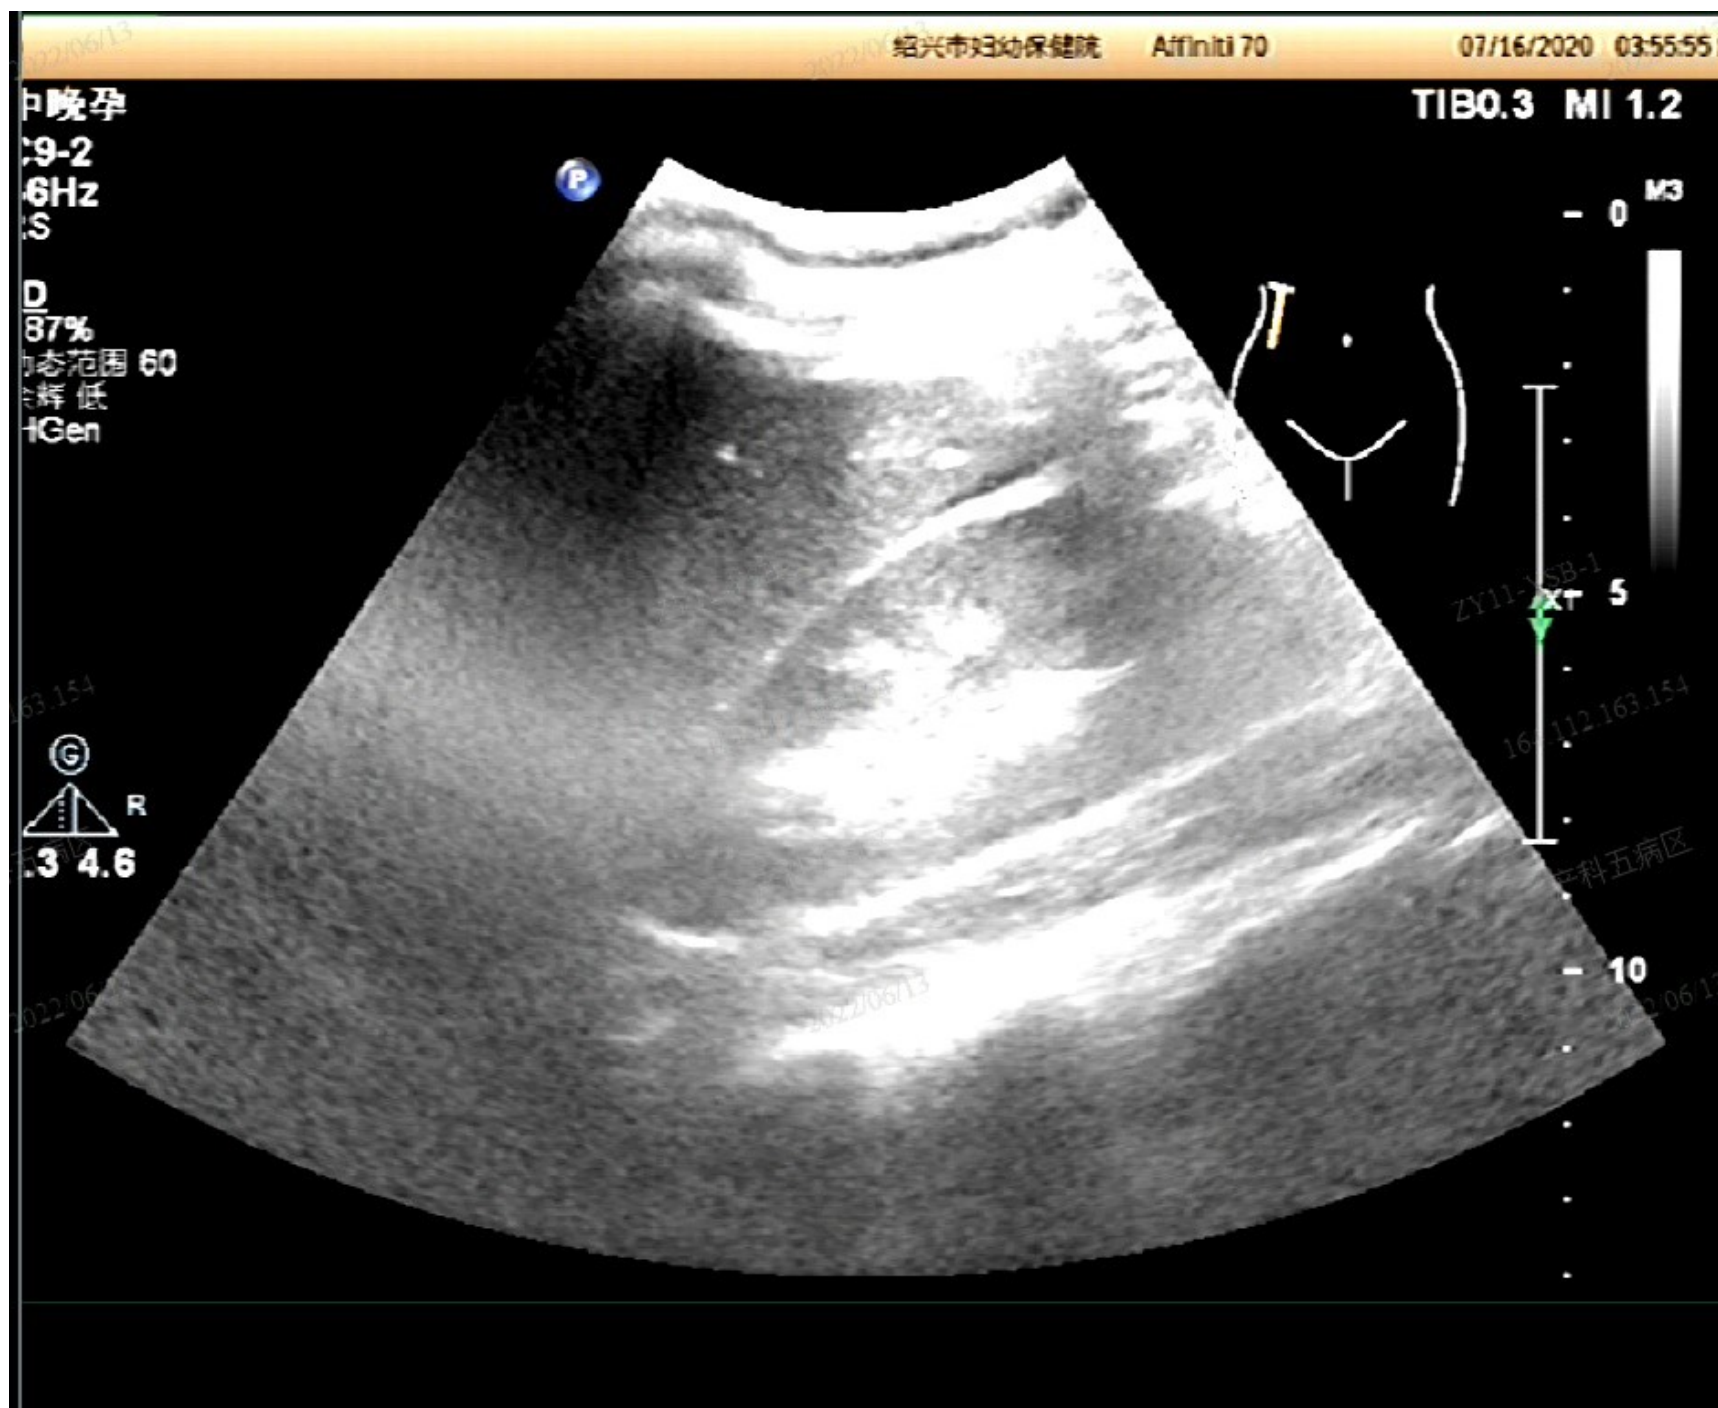

Supplement: d2mo00305h1.pdf [file d2mo00305h1.pdf]

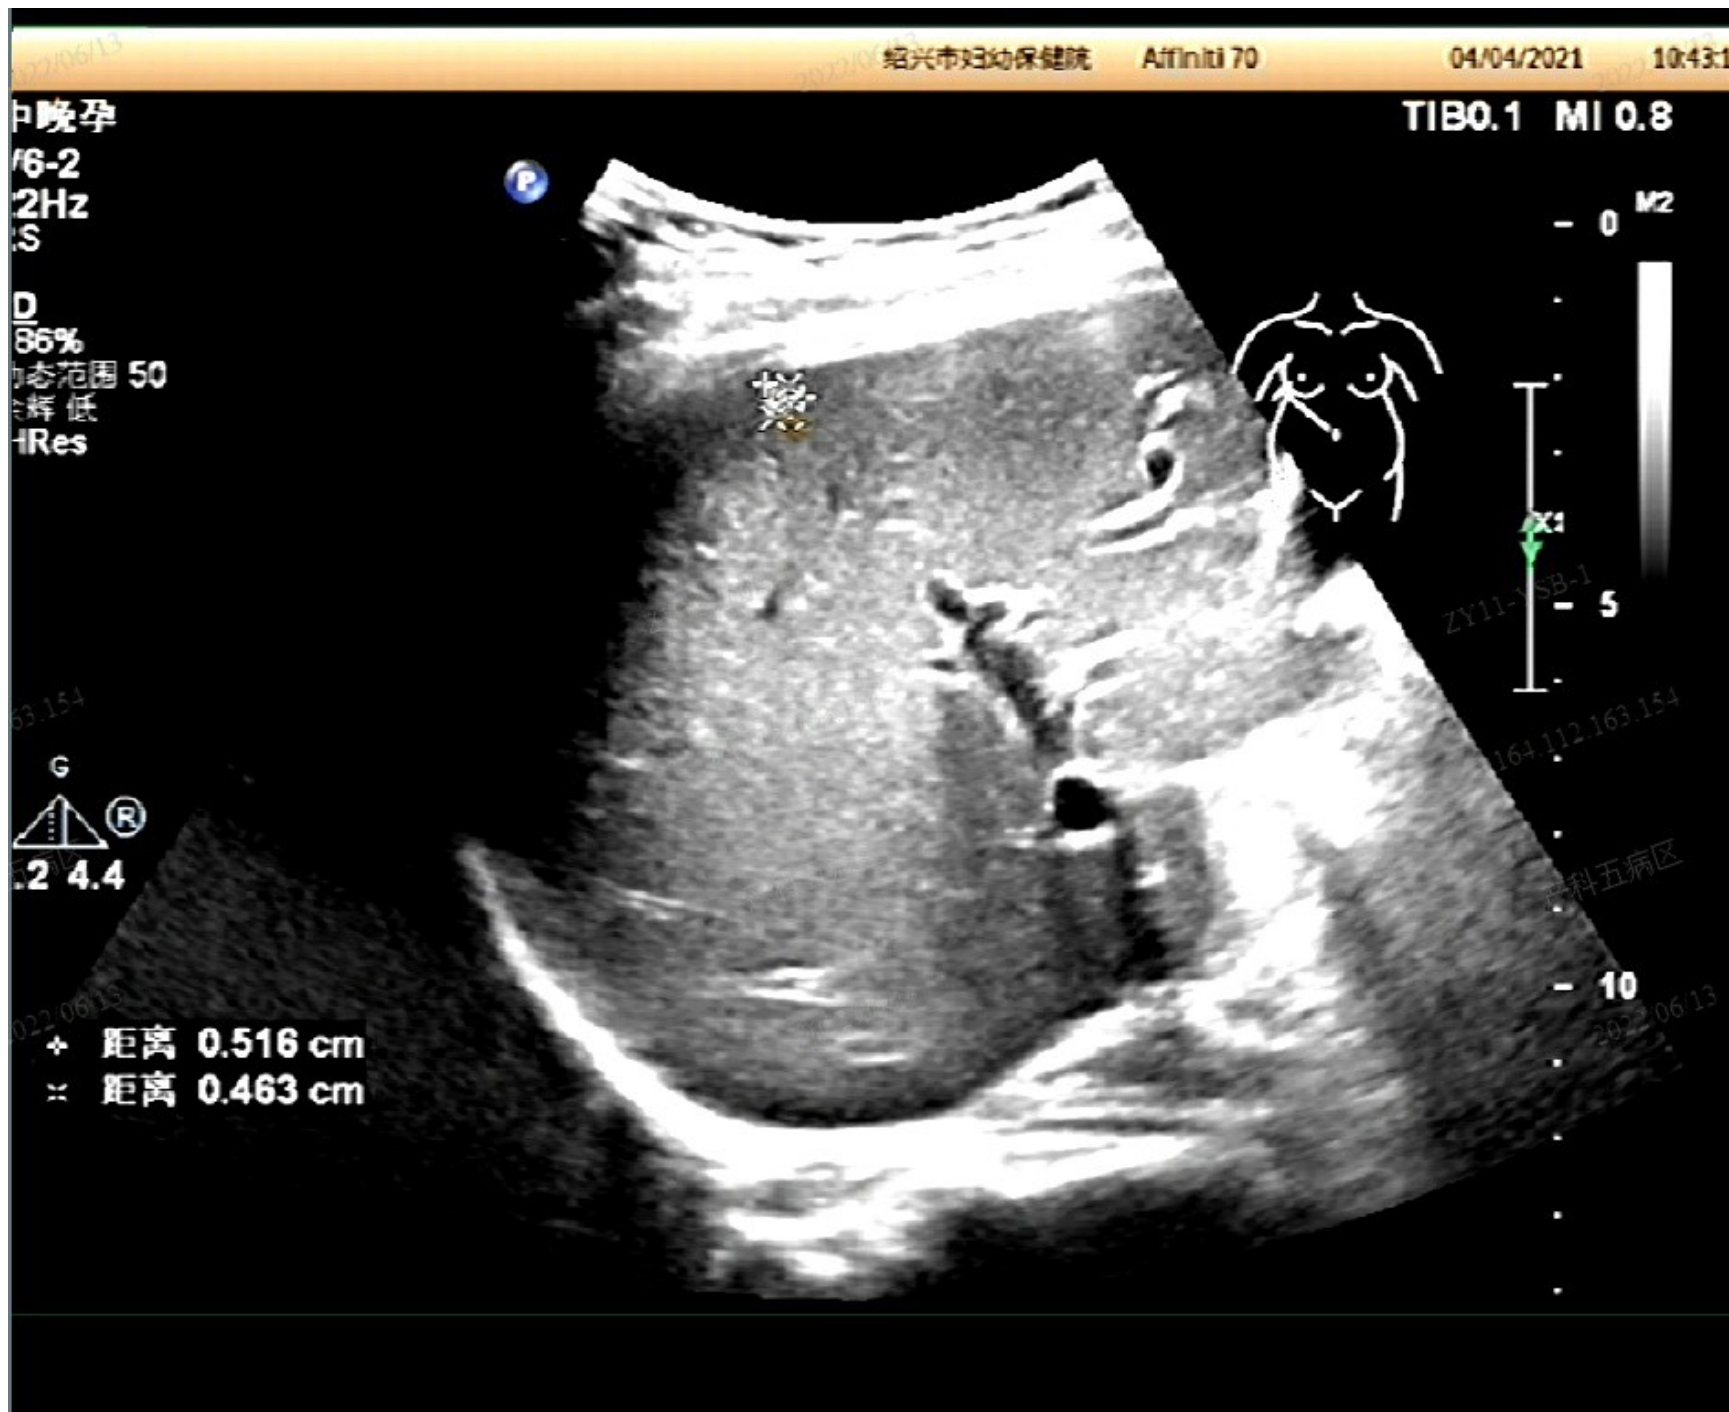

Supplement: d2mo00305h12.pdf [file d2mo00305h12.pdf]

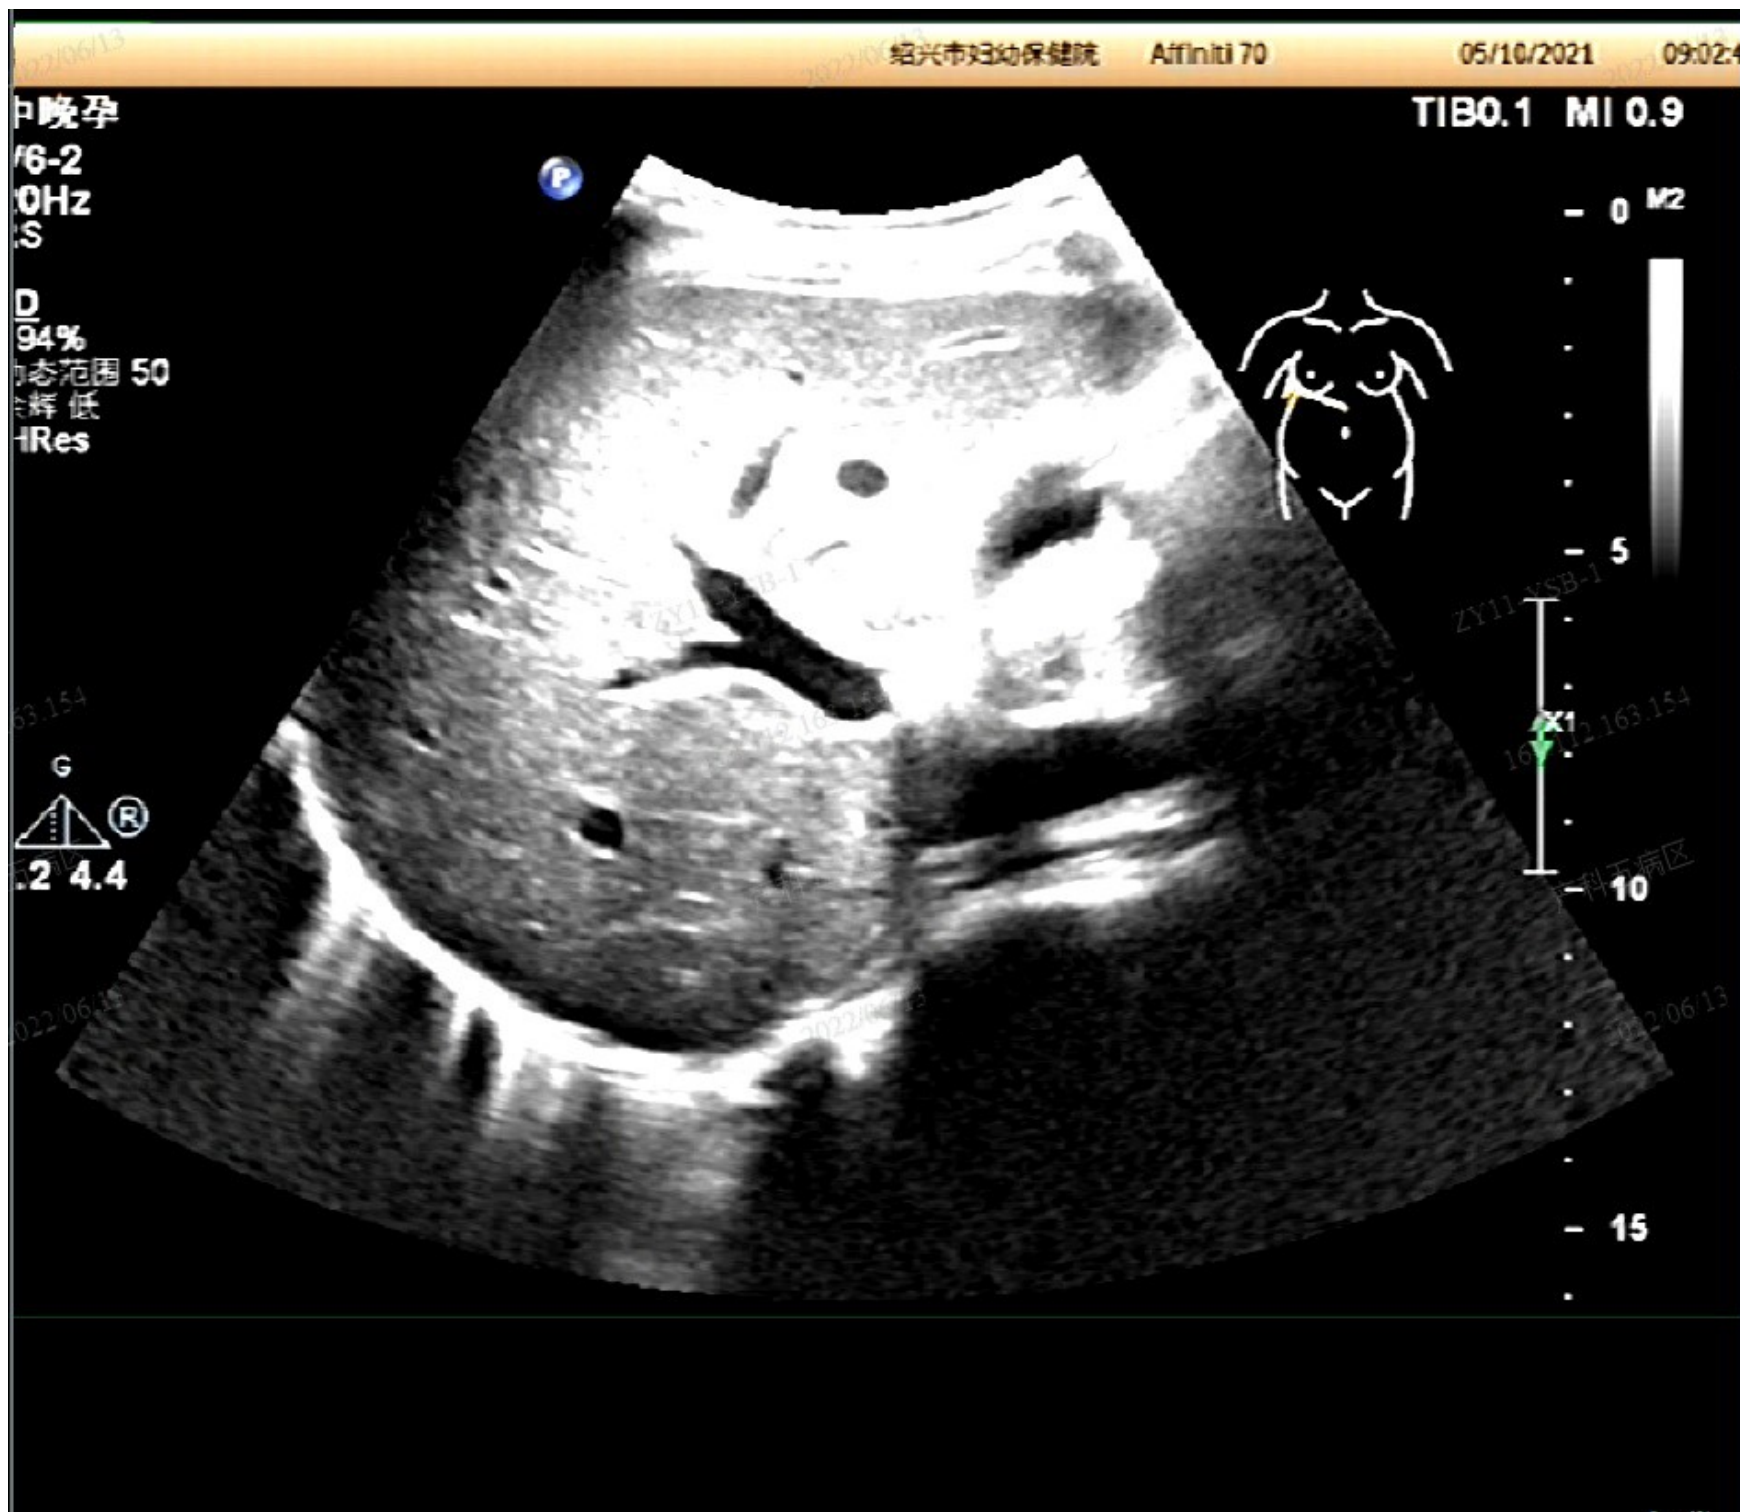

Supplement: d2mo00305h13.pdf [file d2mo00305h13.pdf]

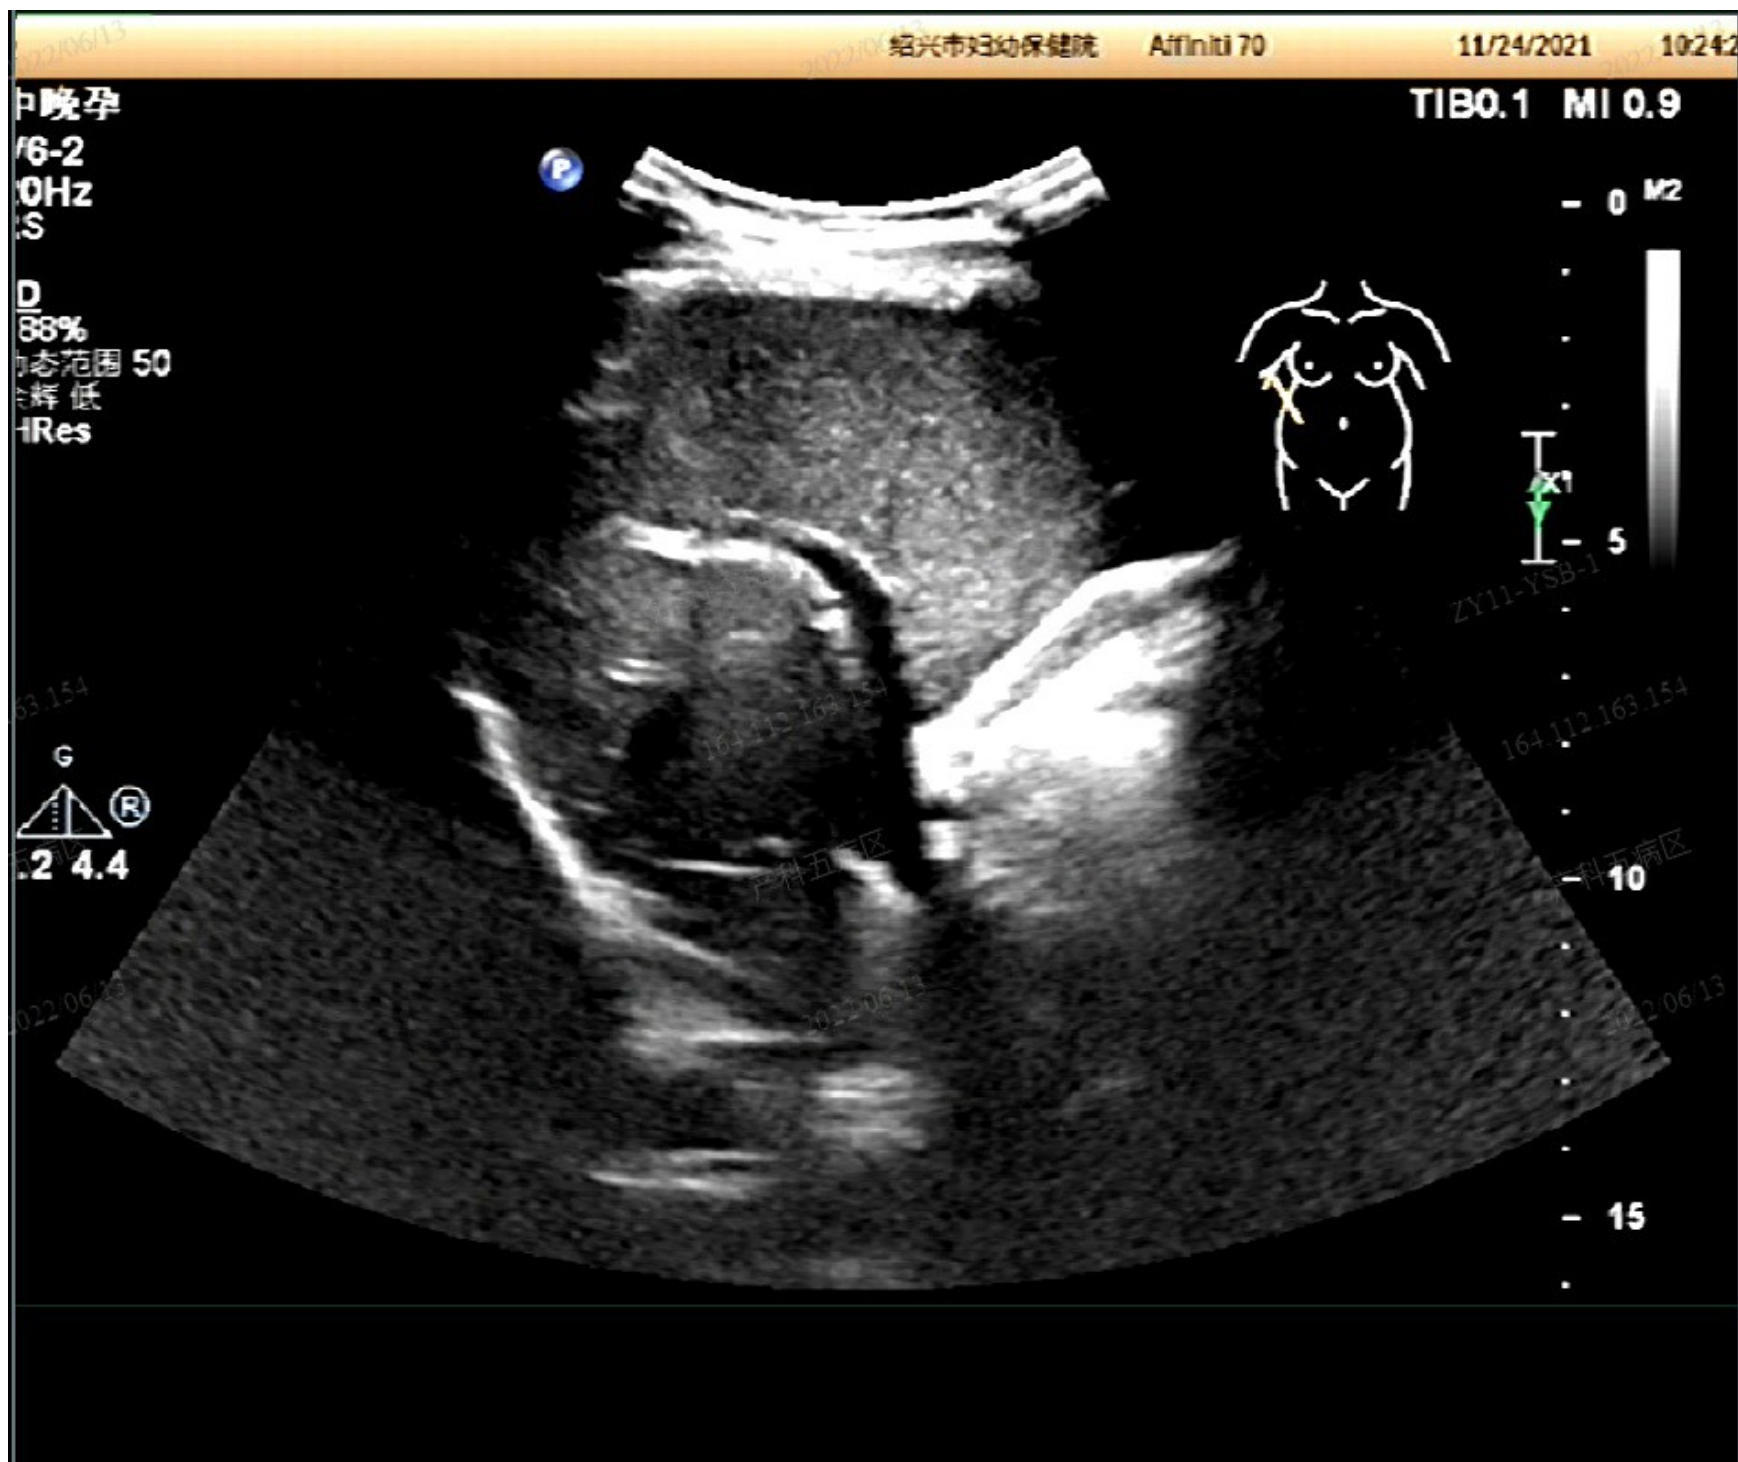

Supplement: d2mo00305h15.pdf [file d2mo00305h15.pdf]

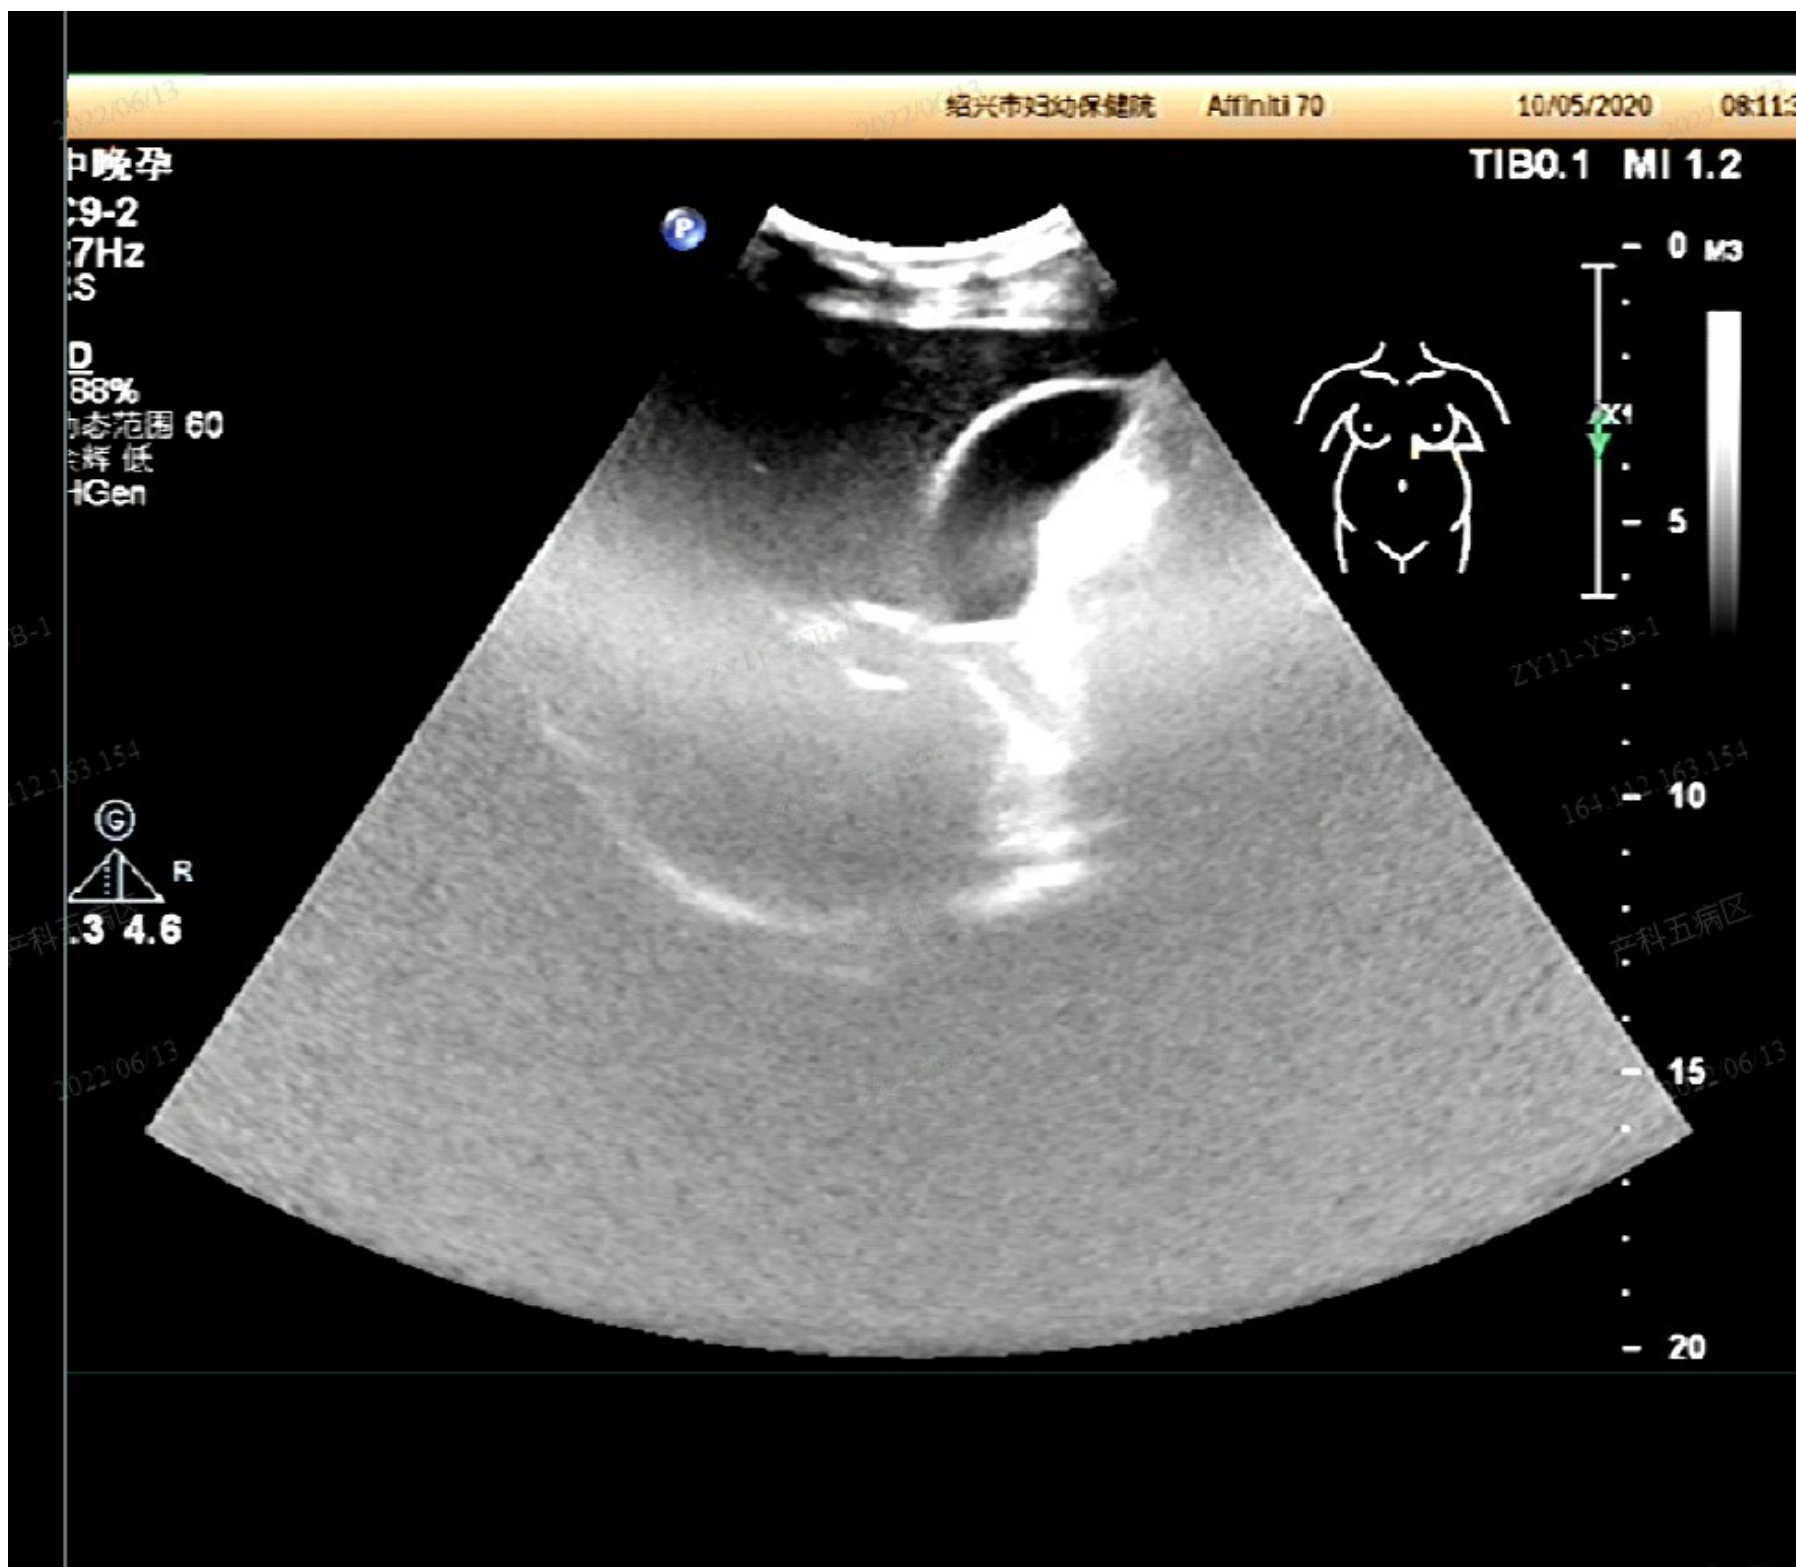

Supplement: d2mo00305h16.pdf [file d2mo00305h16.pdf]

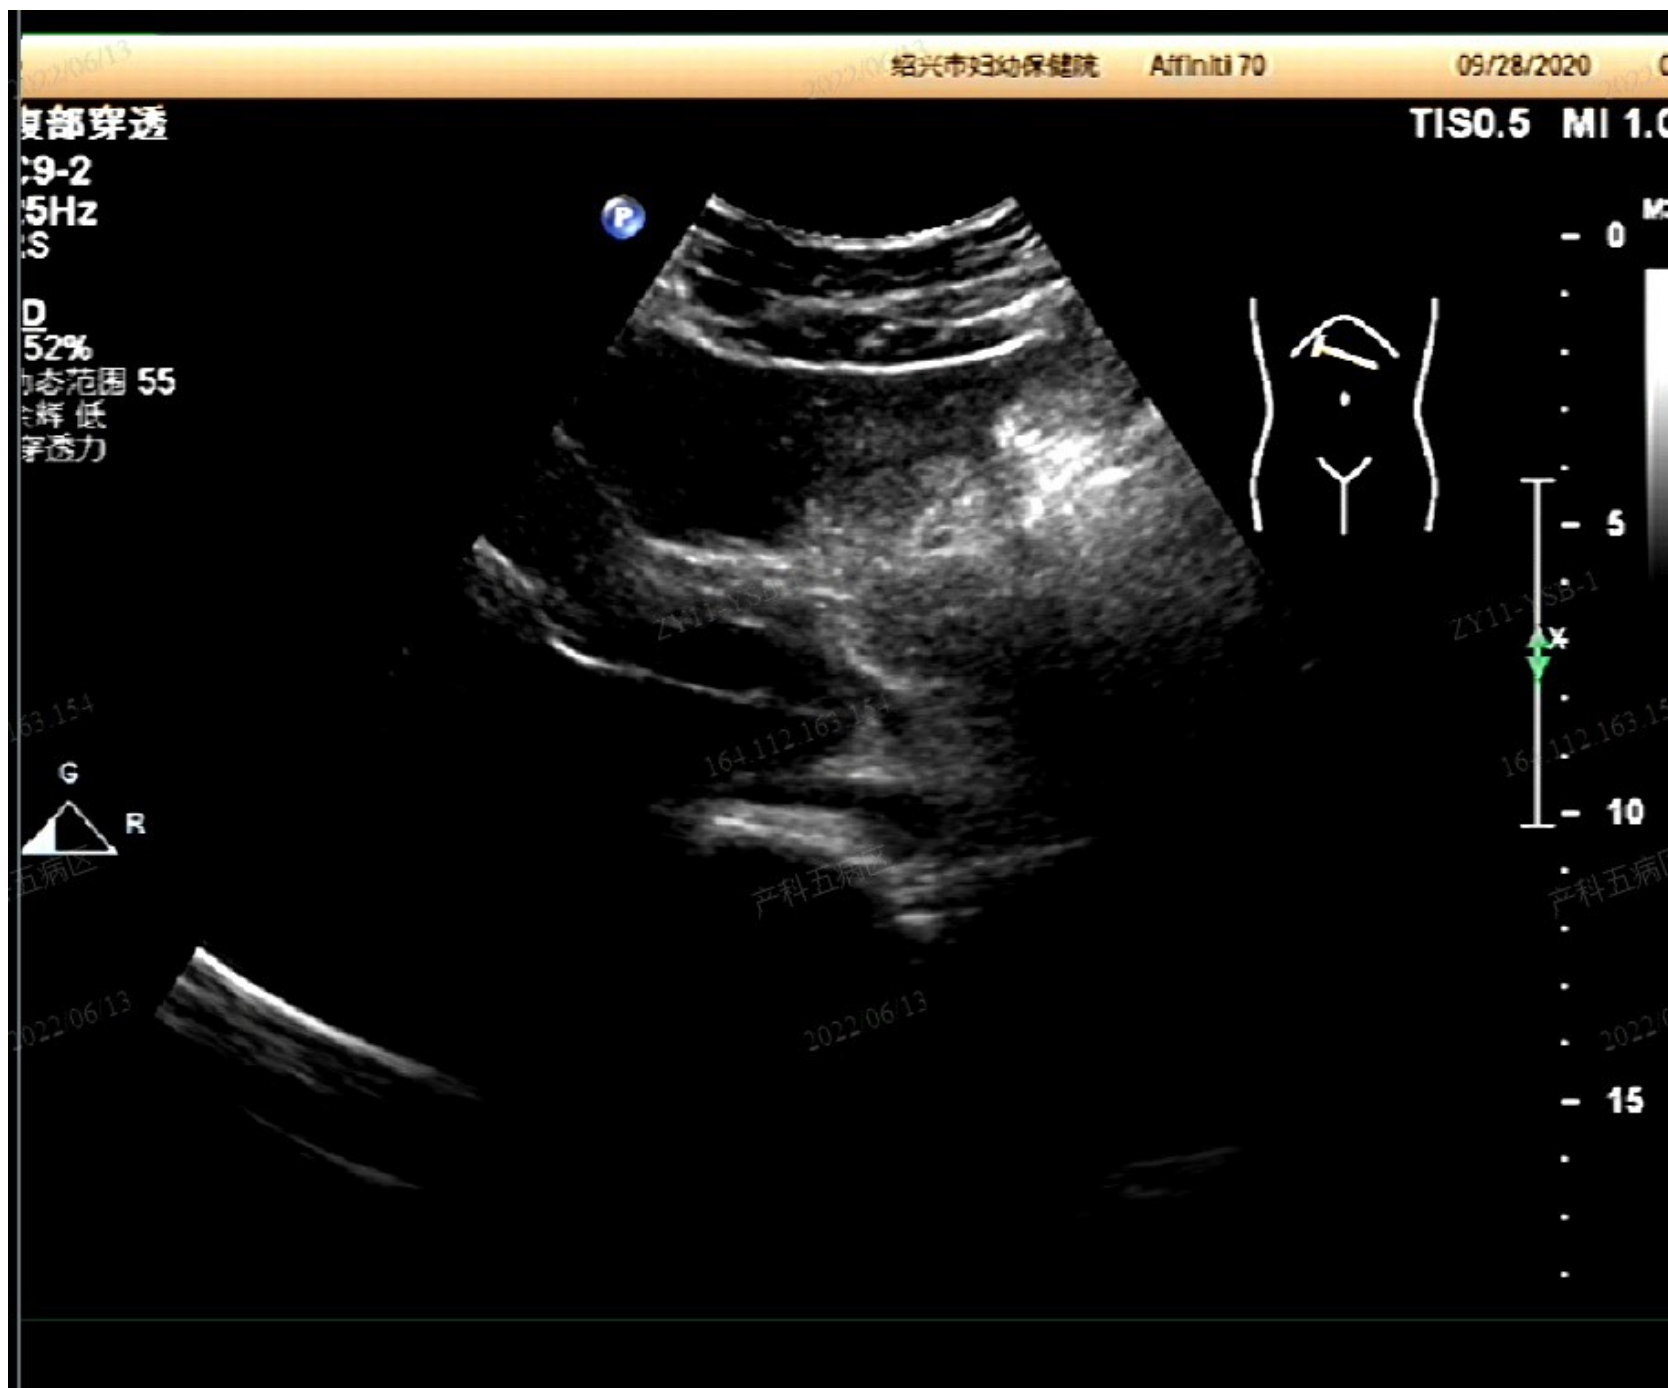

Supplement: d2mo00305h17.pdf [file d2mo00305h17.pdf]

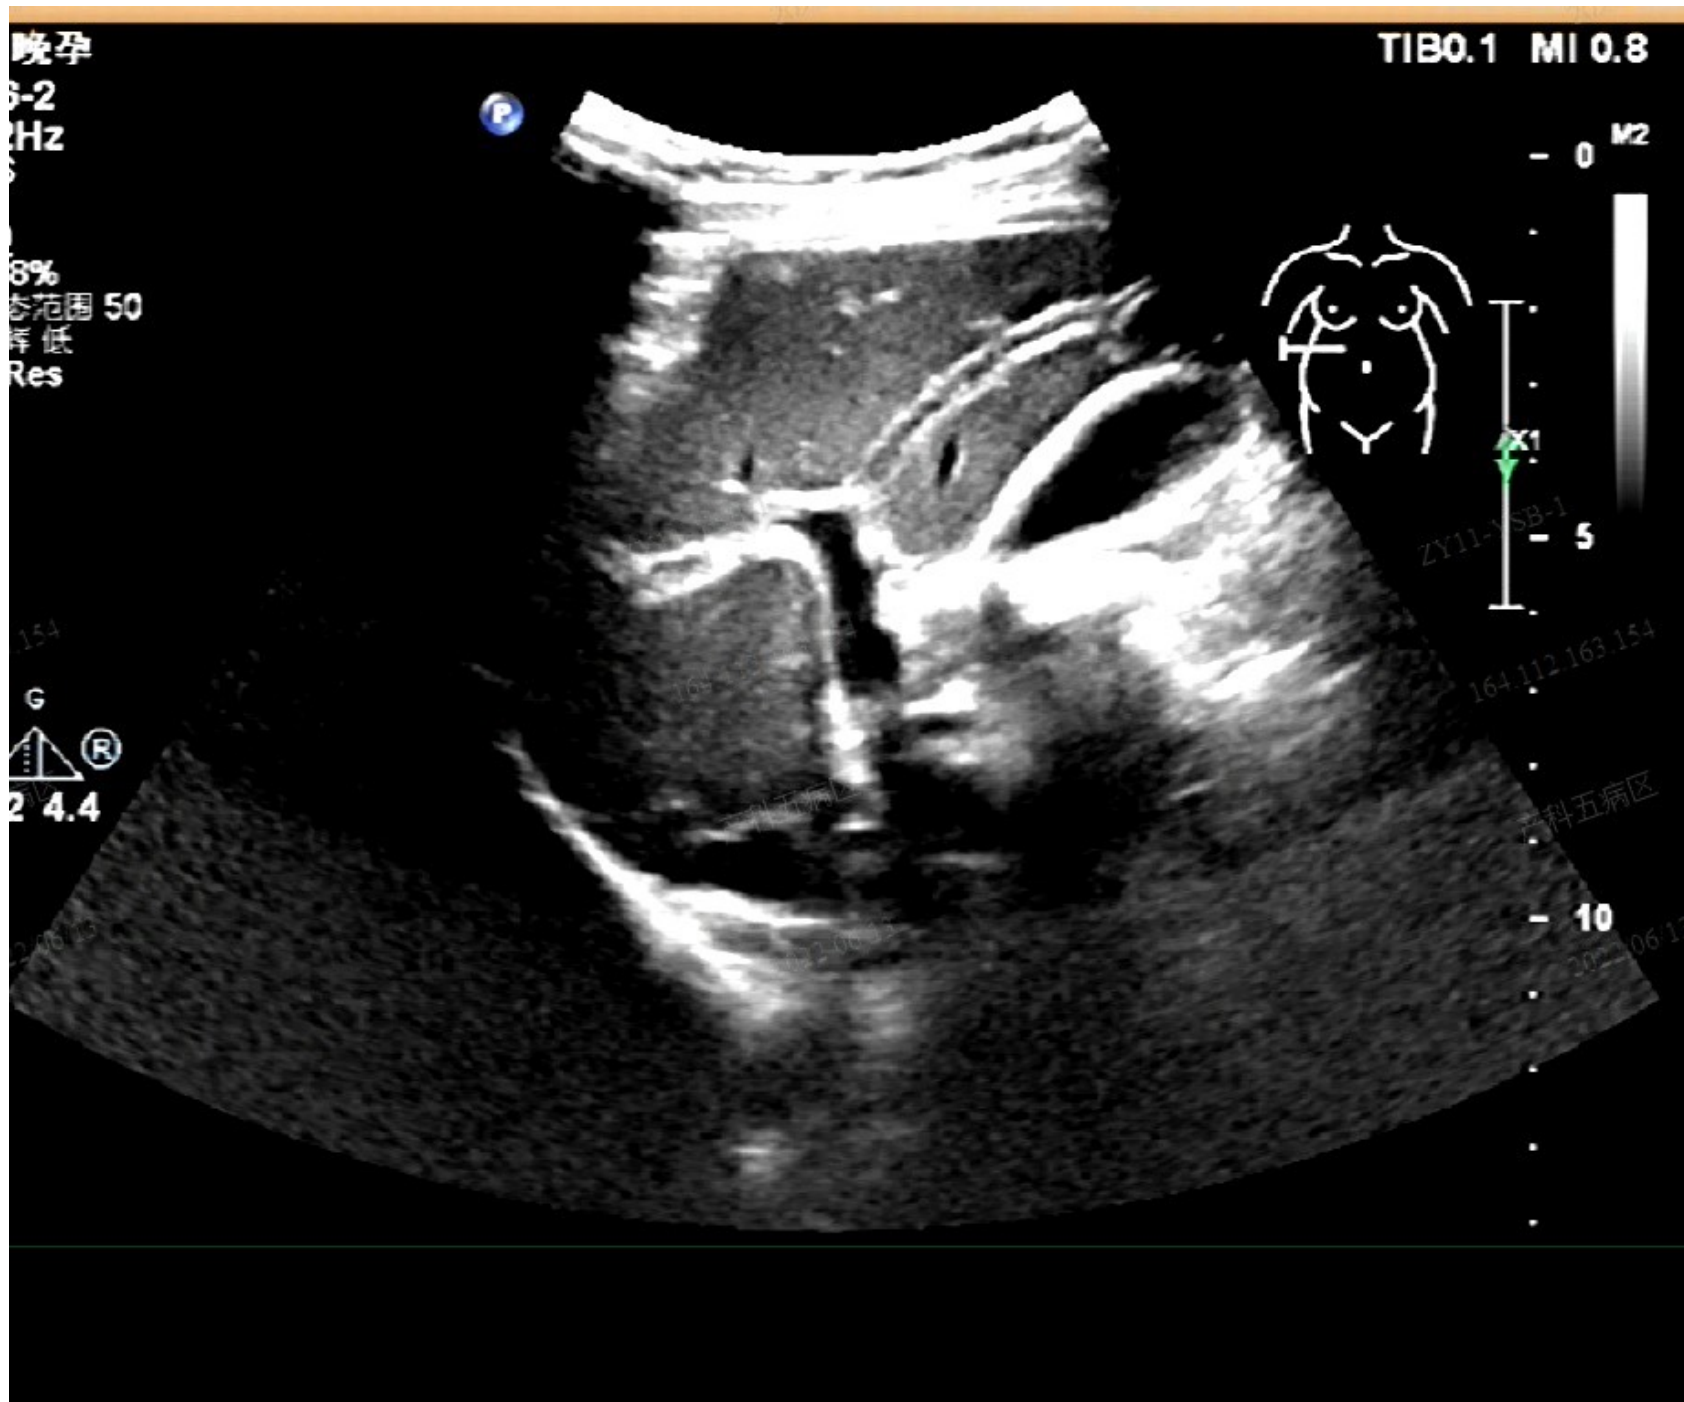

Supplement: d2mo00305h18.pdf [file d2mo00305h18.pdf]

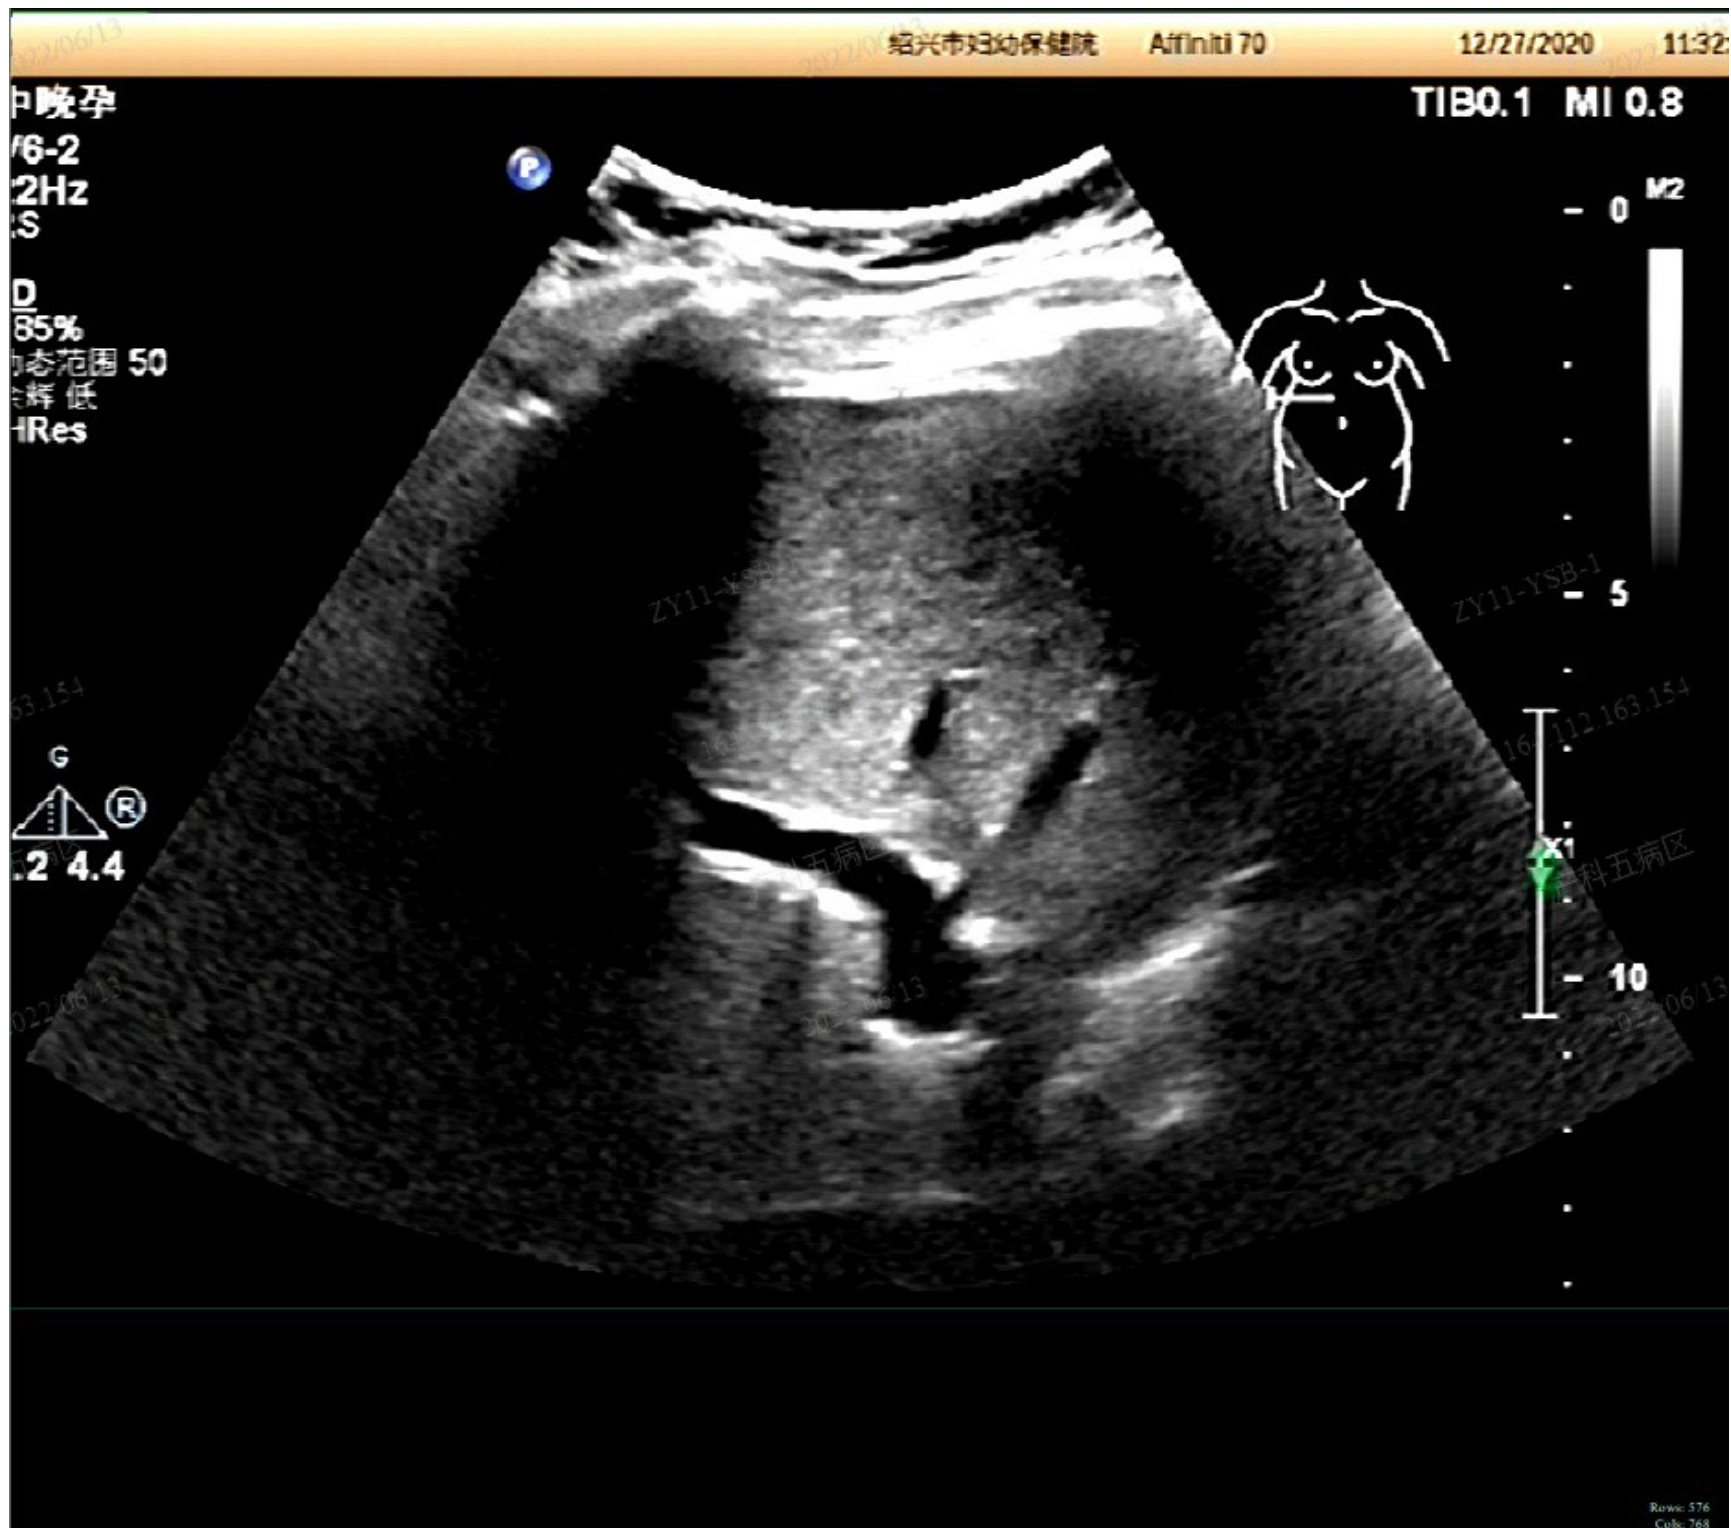

Supplement: d2mo00305h2.pdf [file d2mo00305h2.pdf]

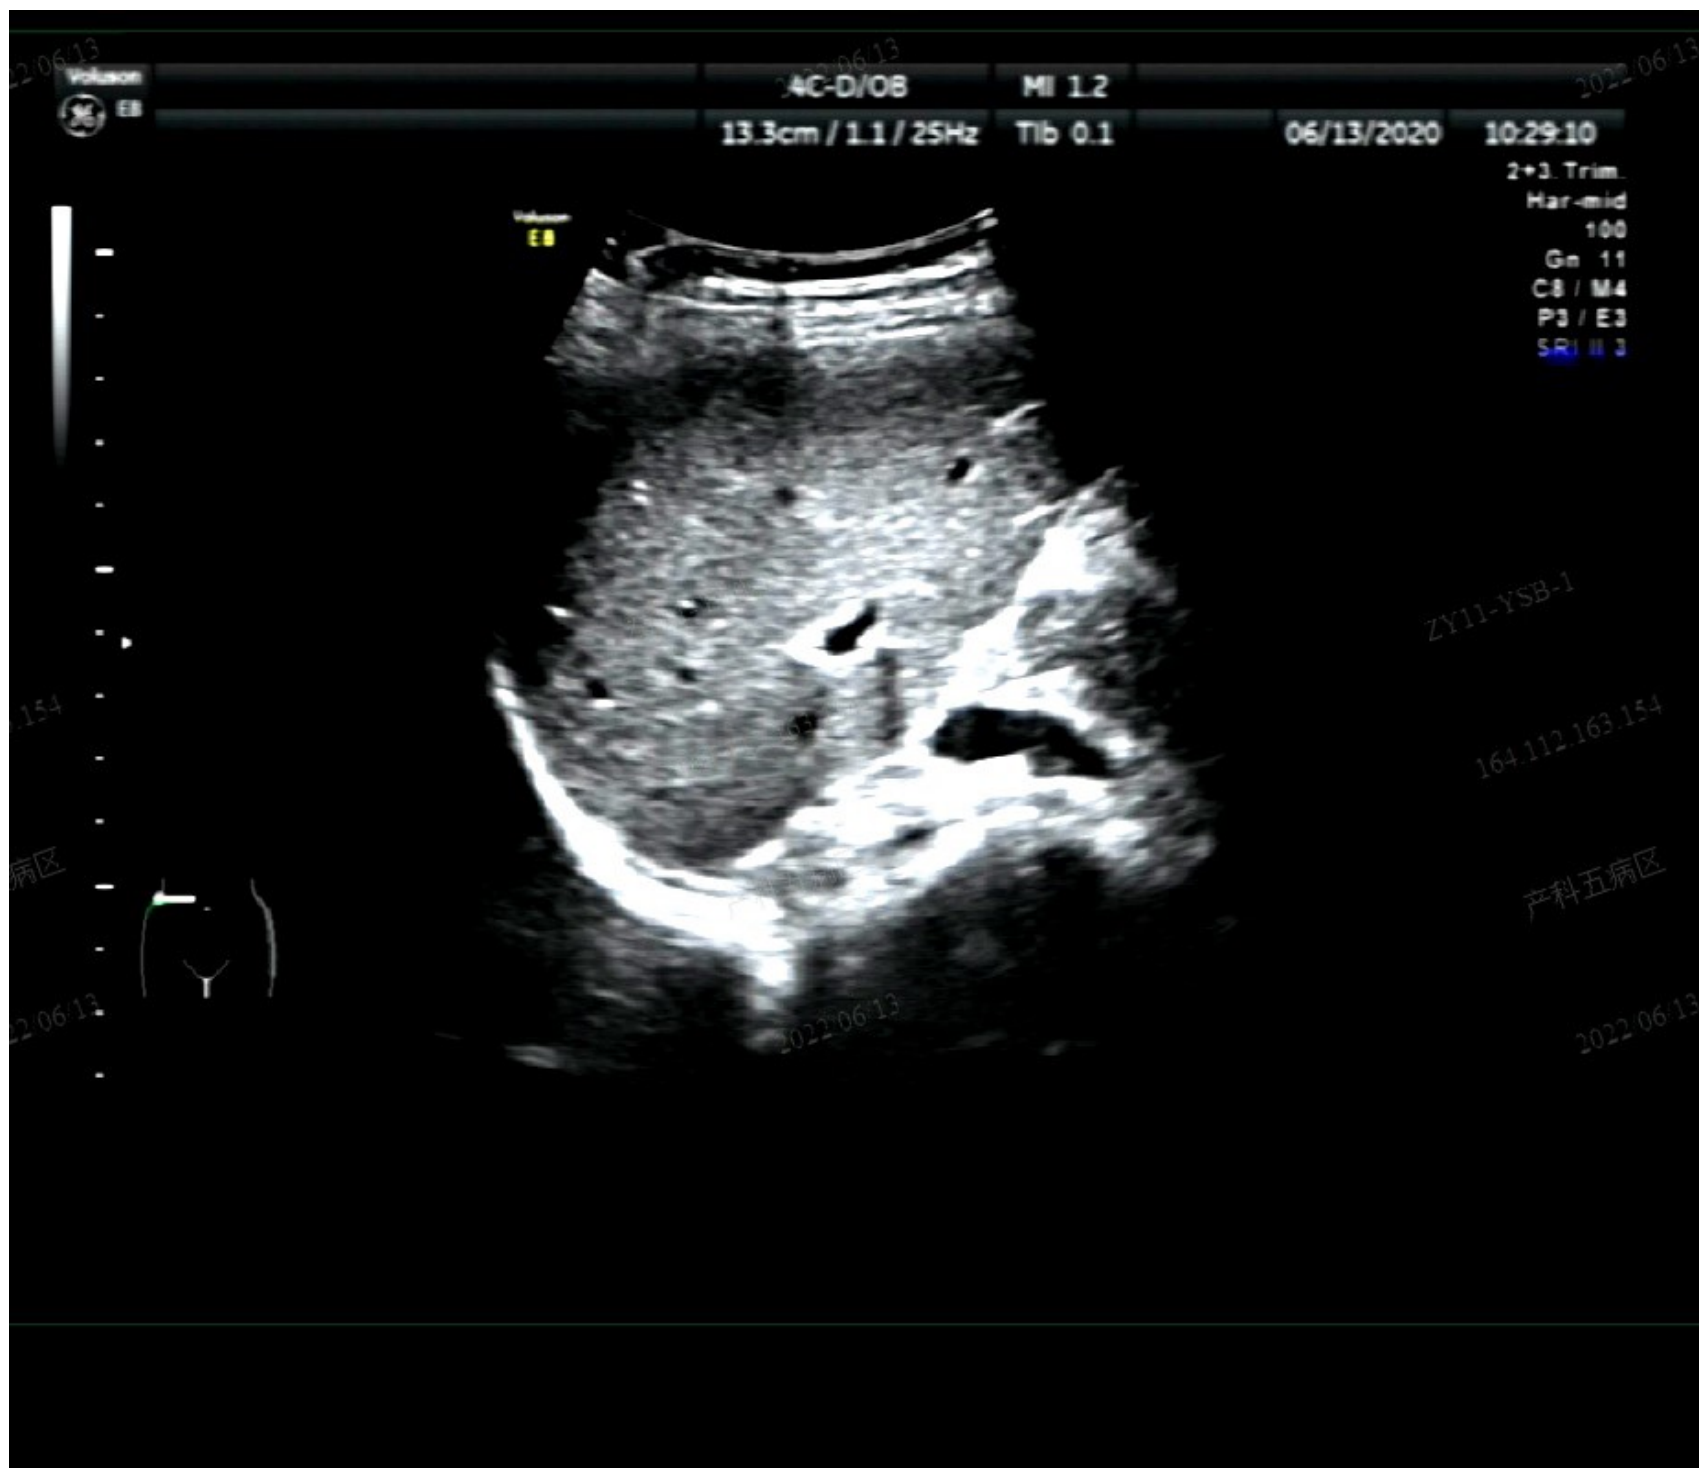

Supplement: d2mo00305h20.pdf [file d2mo00305h20.pdf]

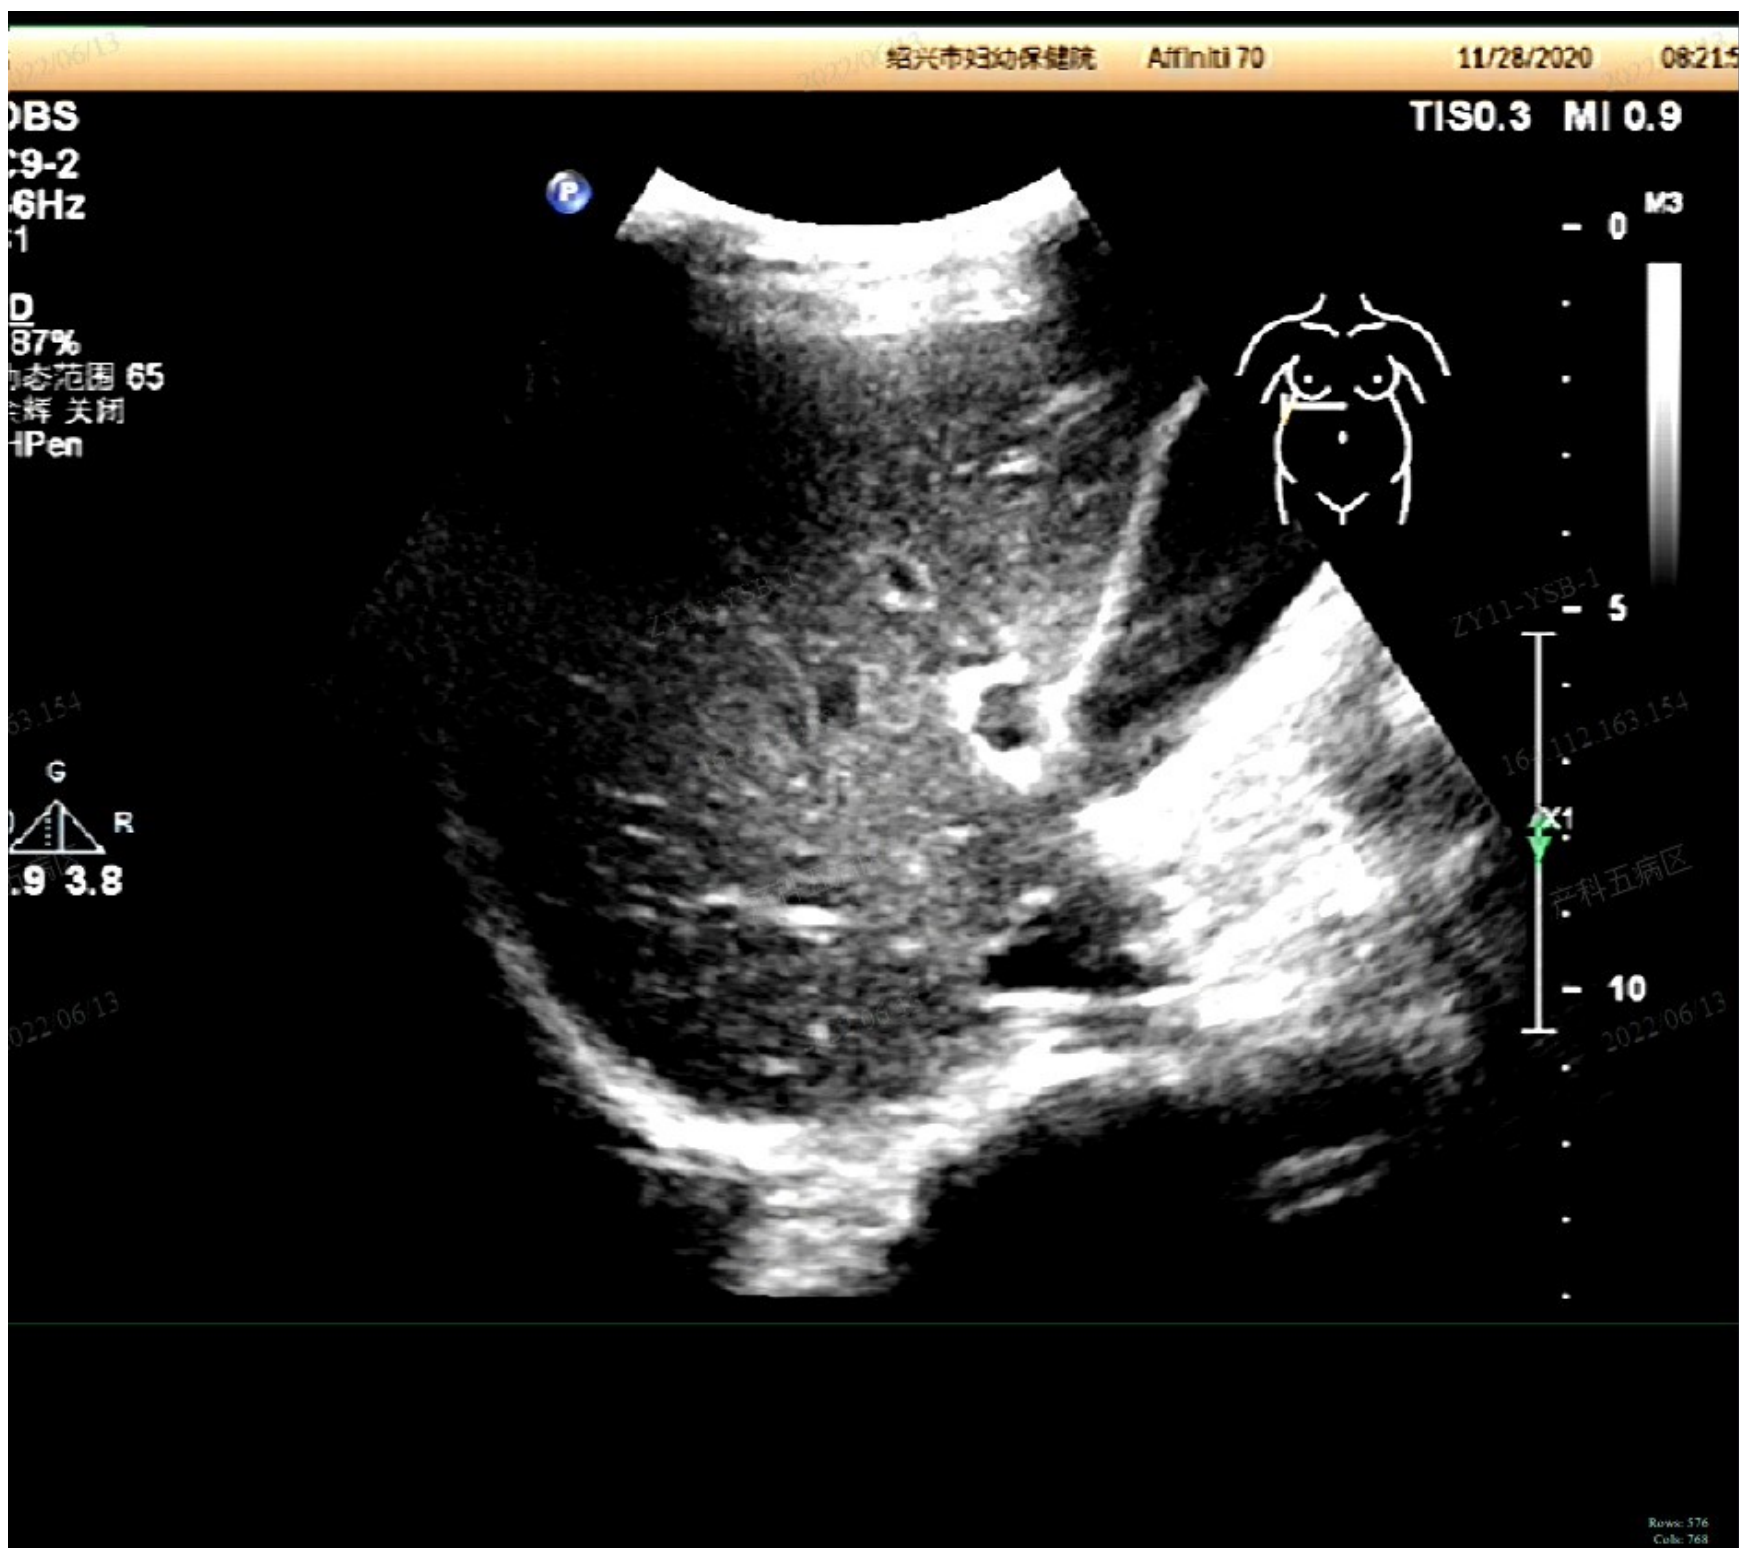

Supplement: d2mo00305h21.pdf [file d2mo00305h21.pdf]

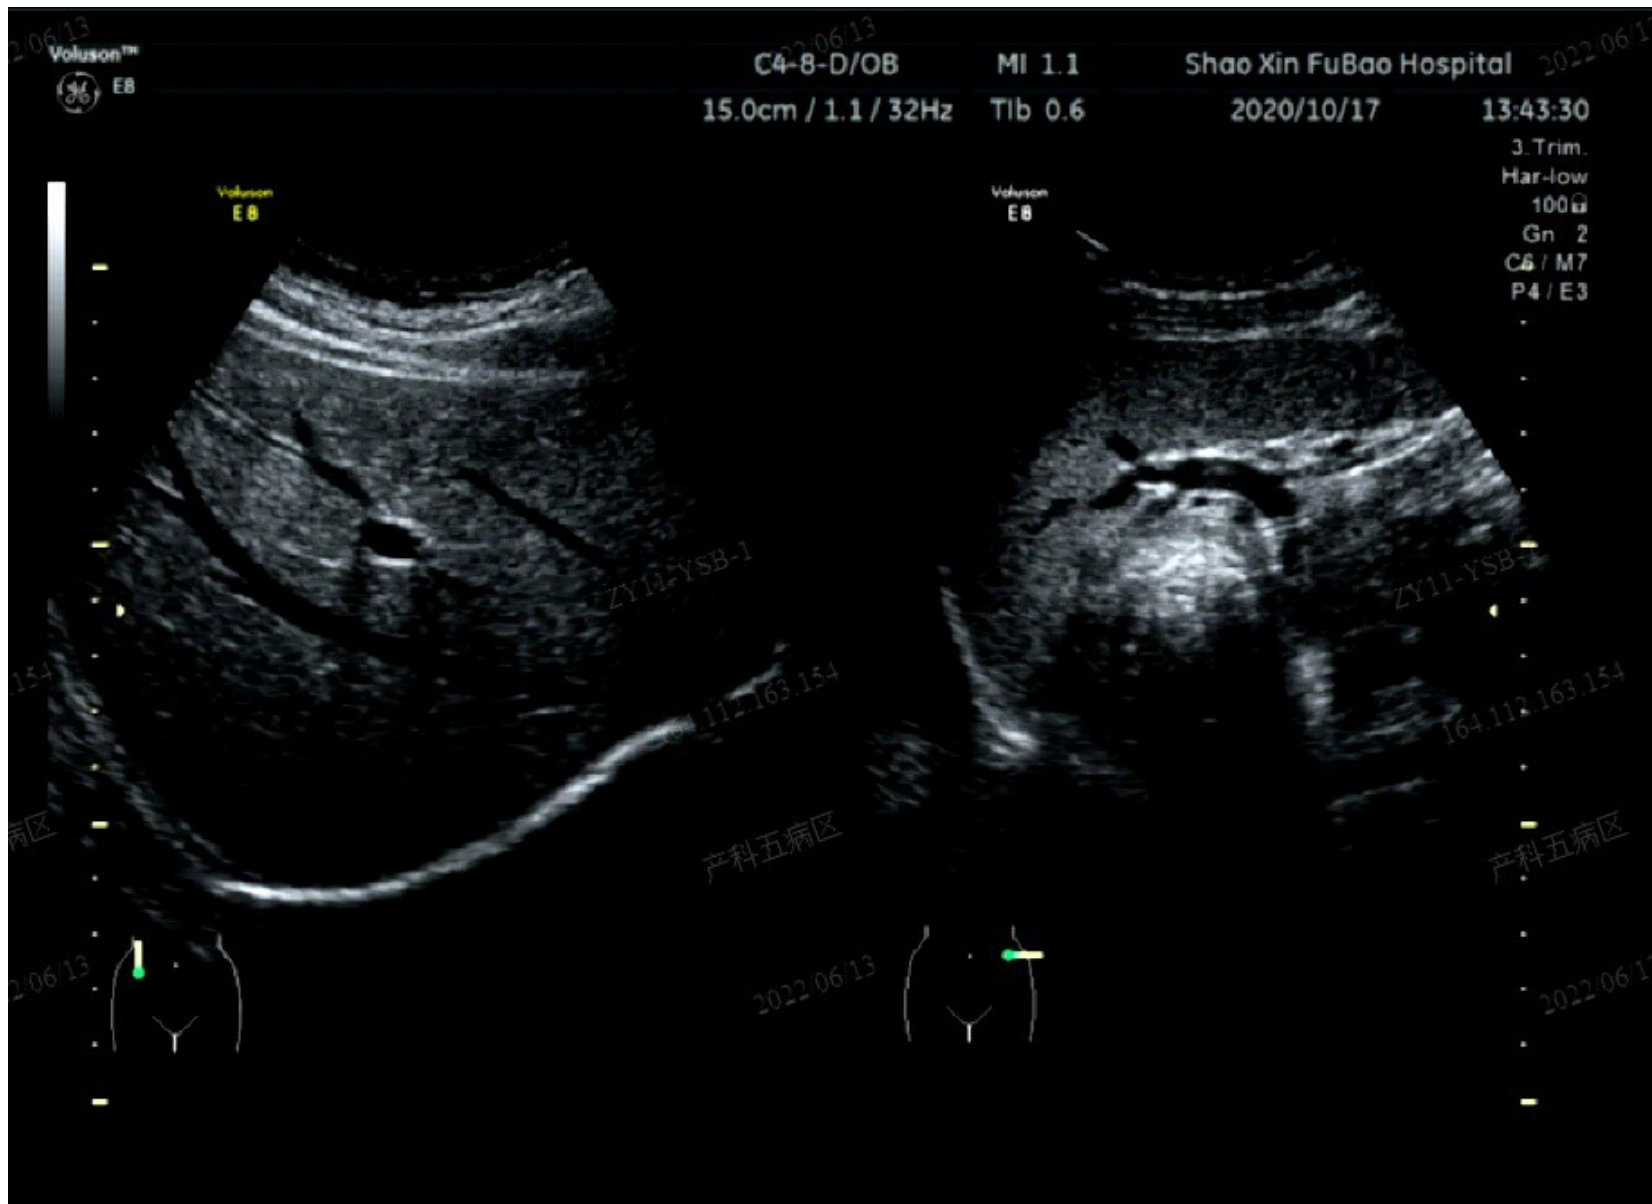

Supplement: d2mo00305h3.pdf [file d2mo00305h3.pdf]

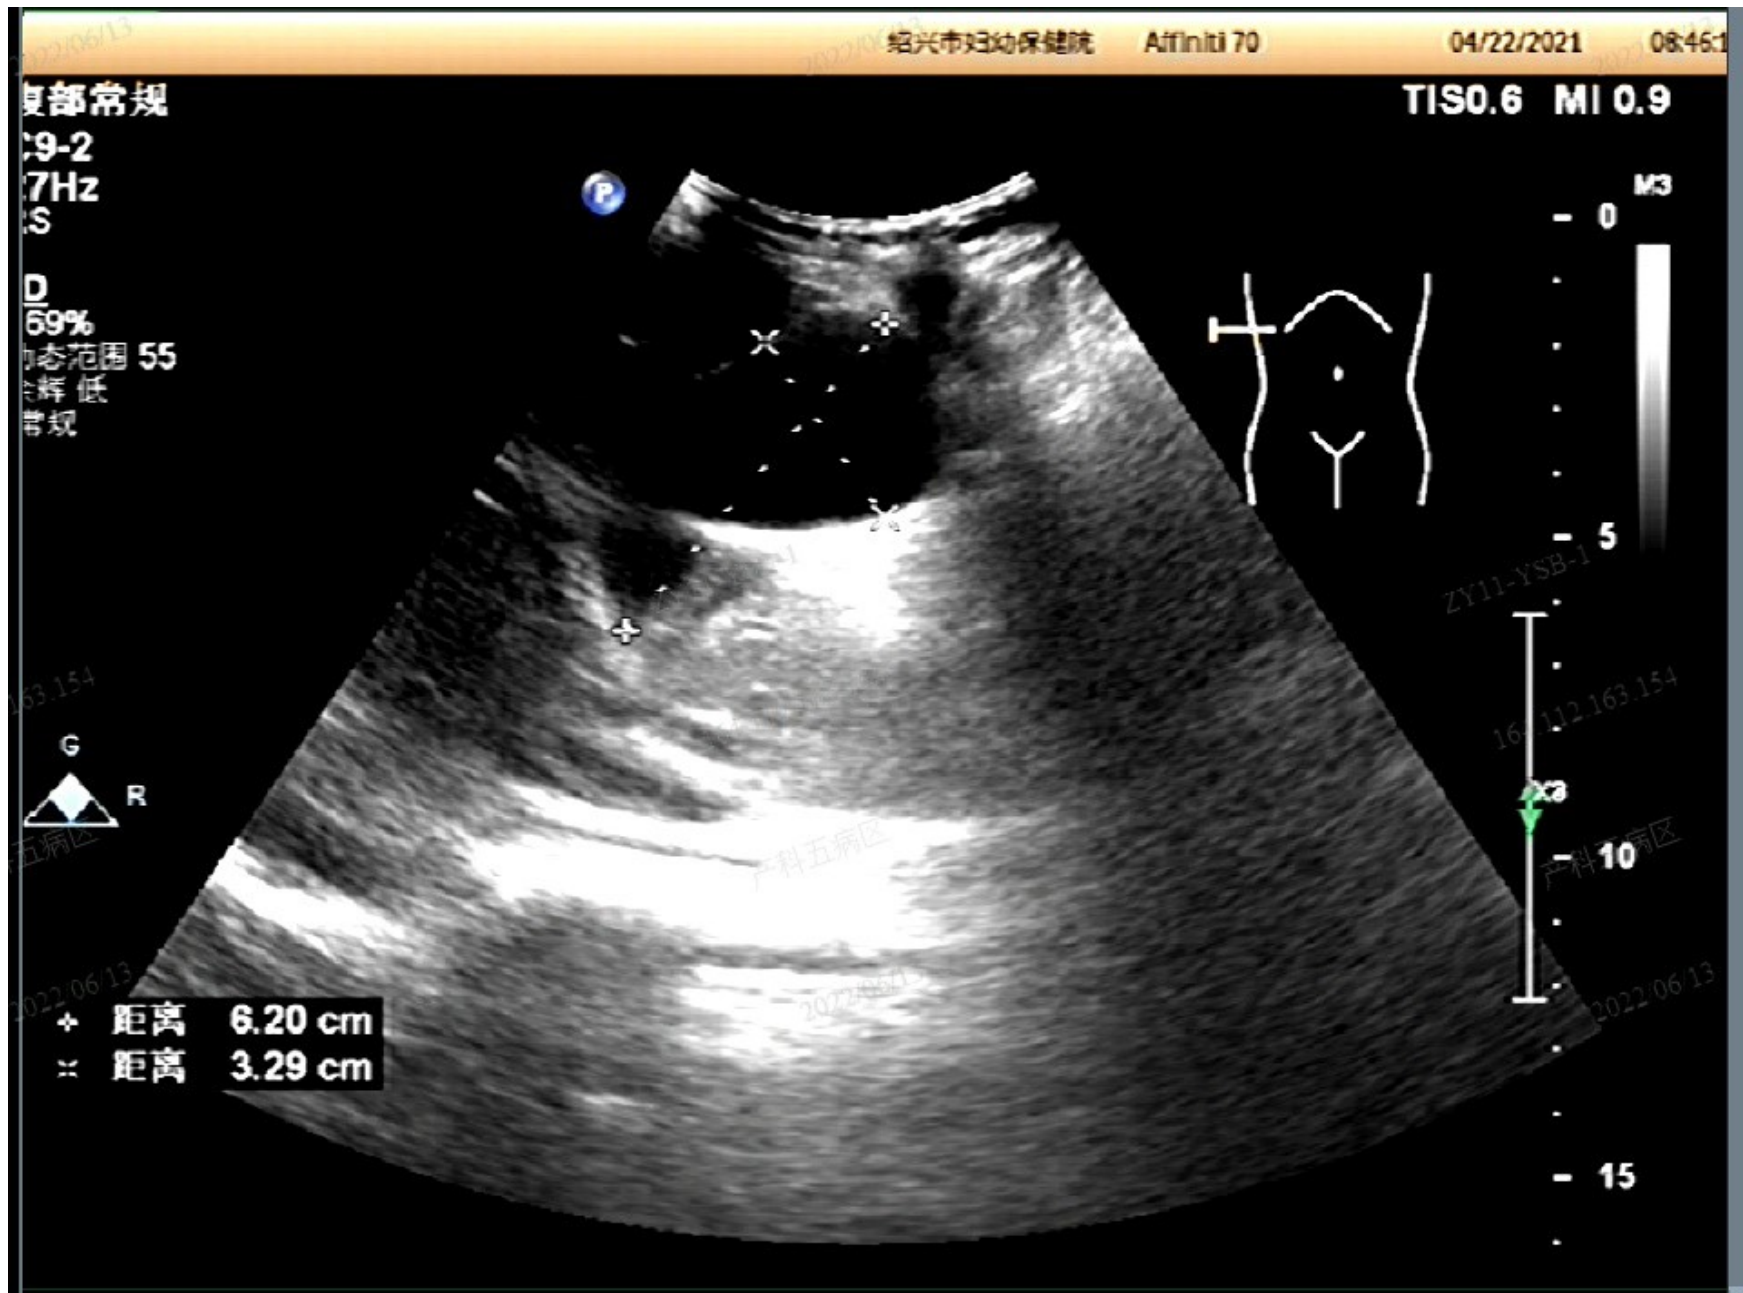

Supplement: d2mo00305h4.pdf [file d2mo00305h4.pdf]

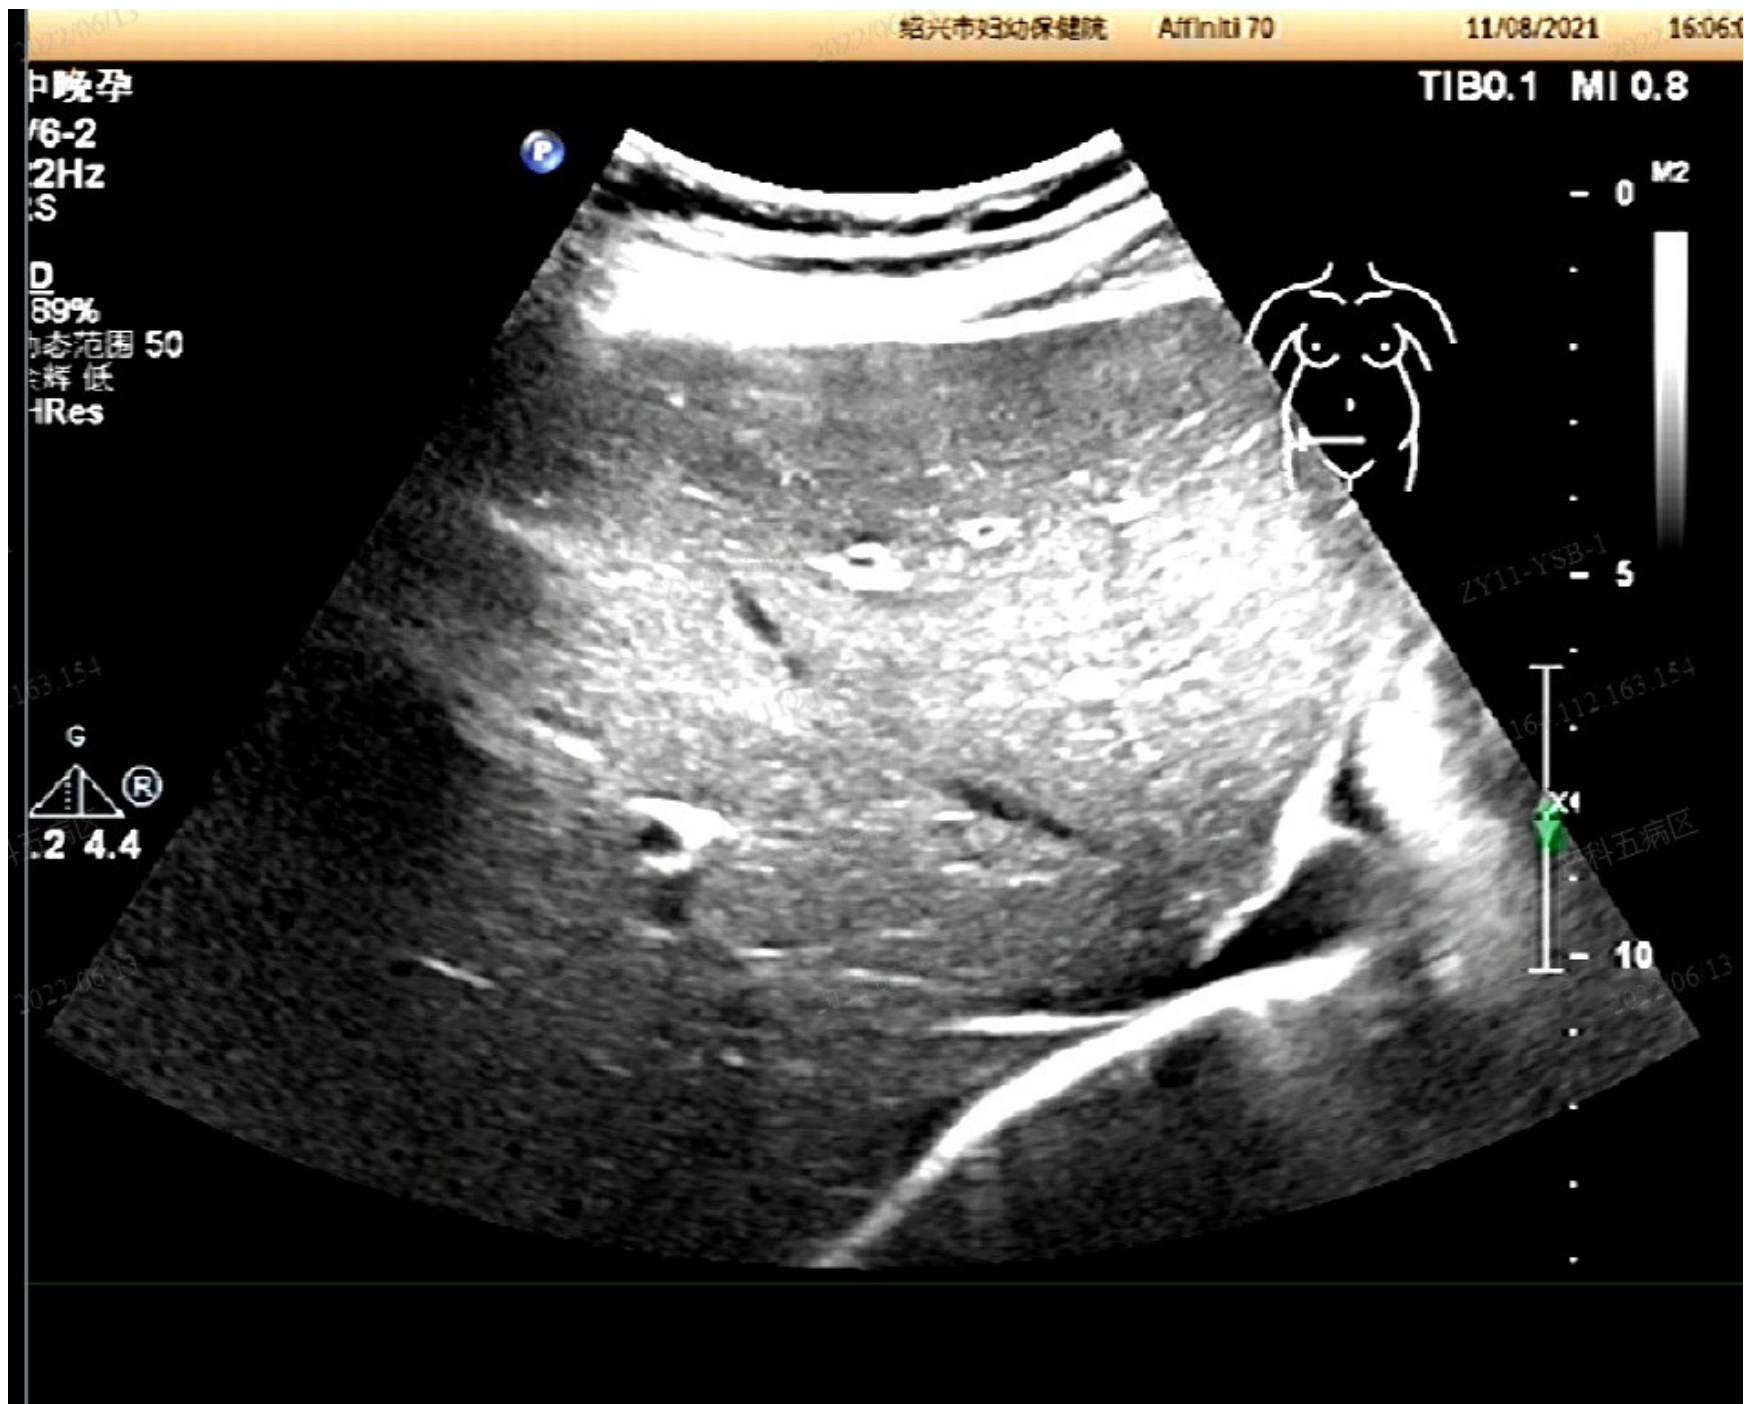

Supplement: d2mo00305h5.pdf [file d2mo00305h5.pdf]

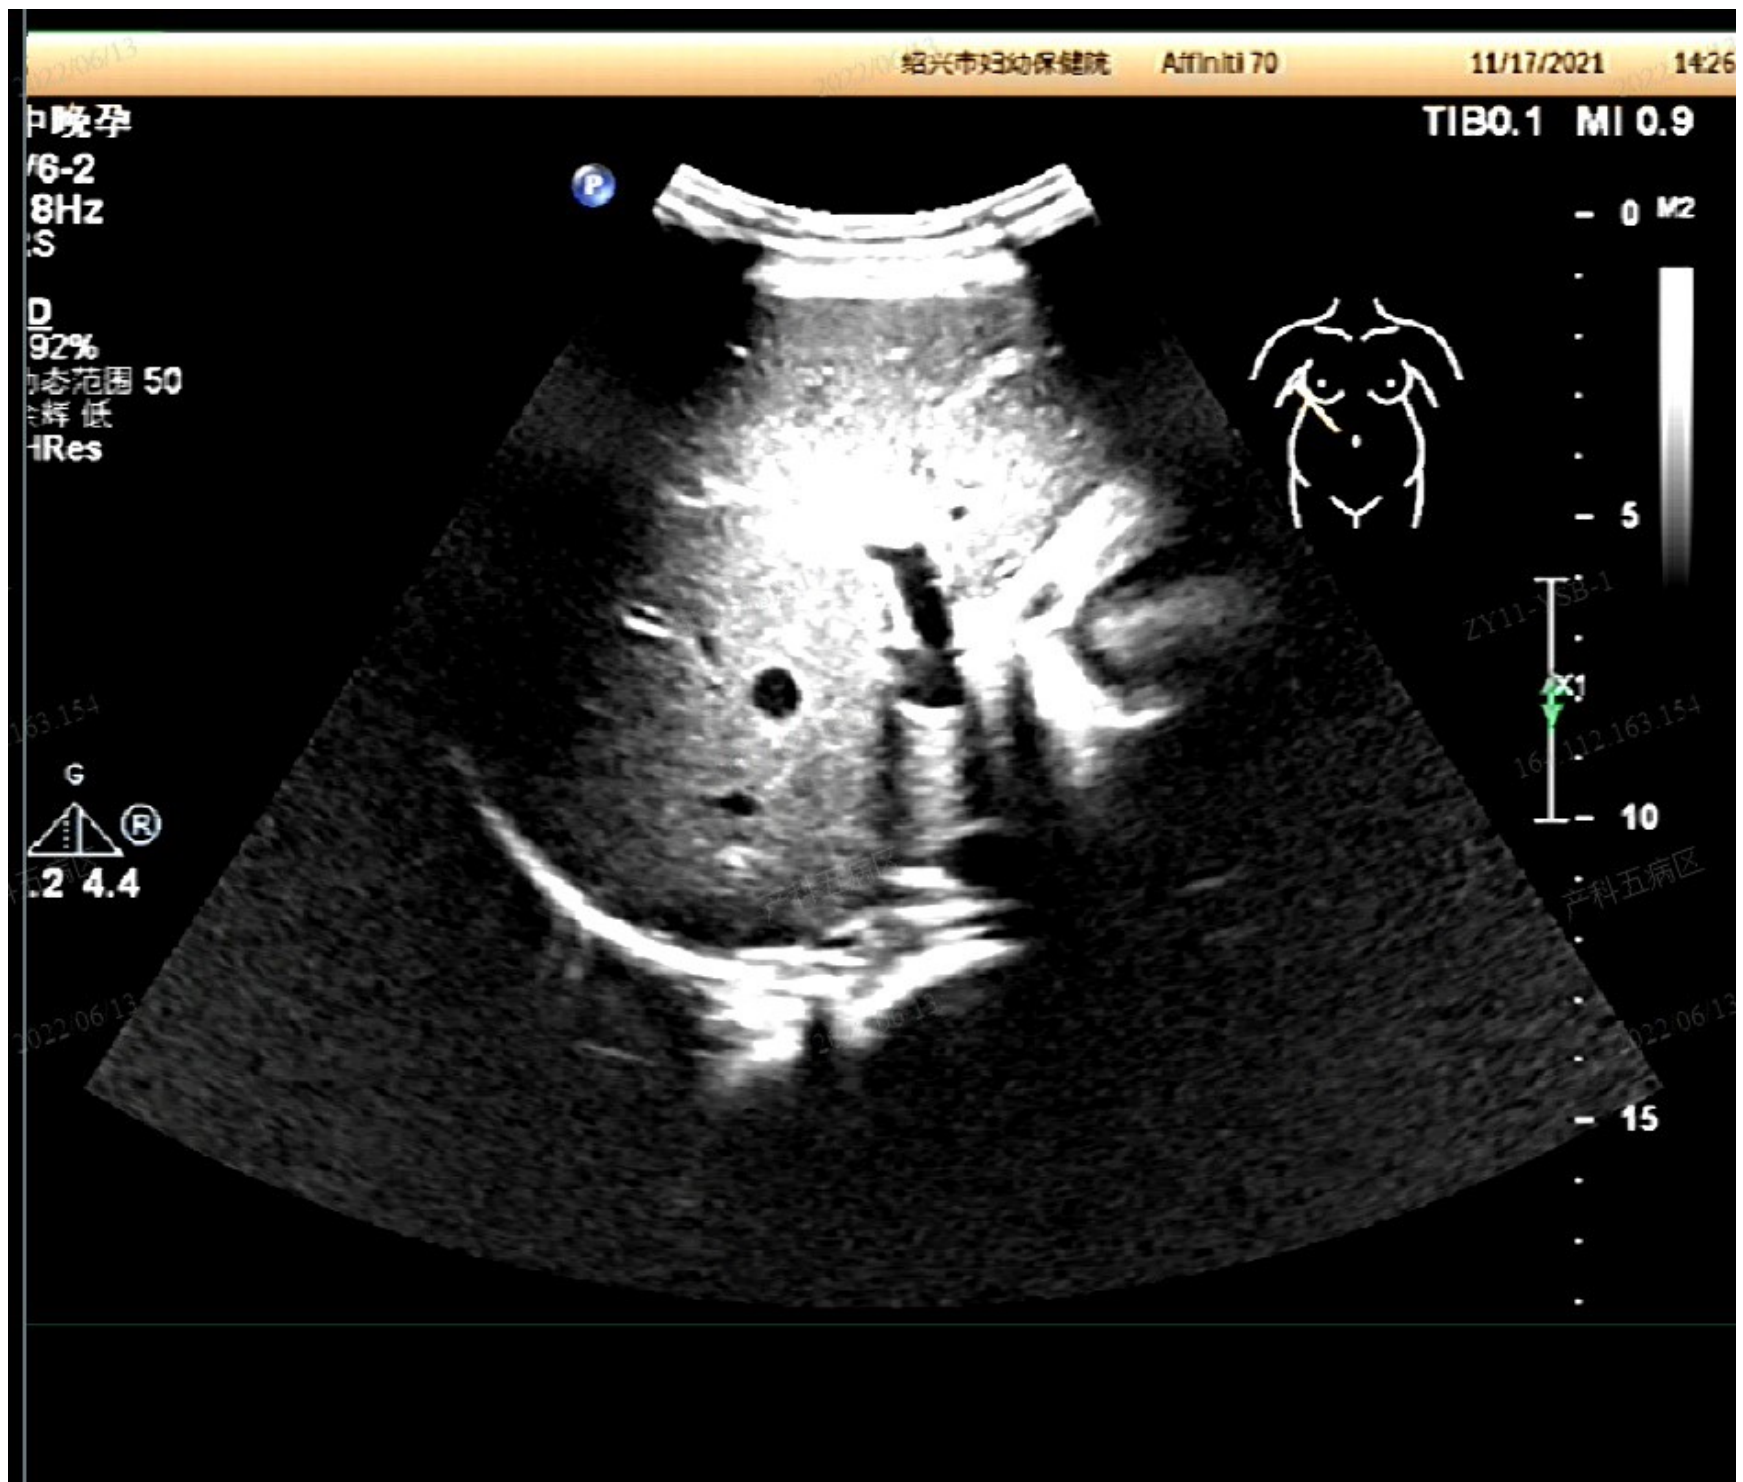

Supplement: d2mo00305h7.pdf [file d2mo00305h7.pdf]

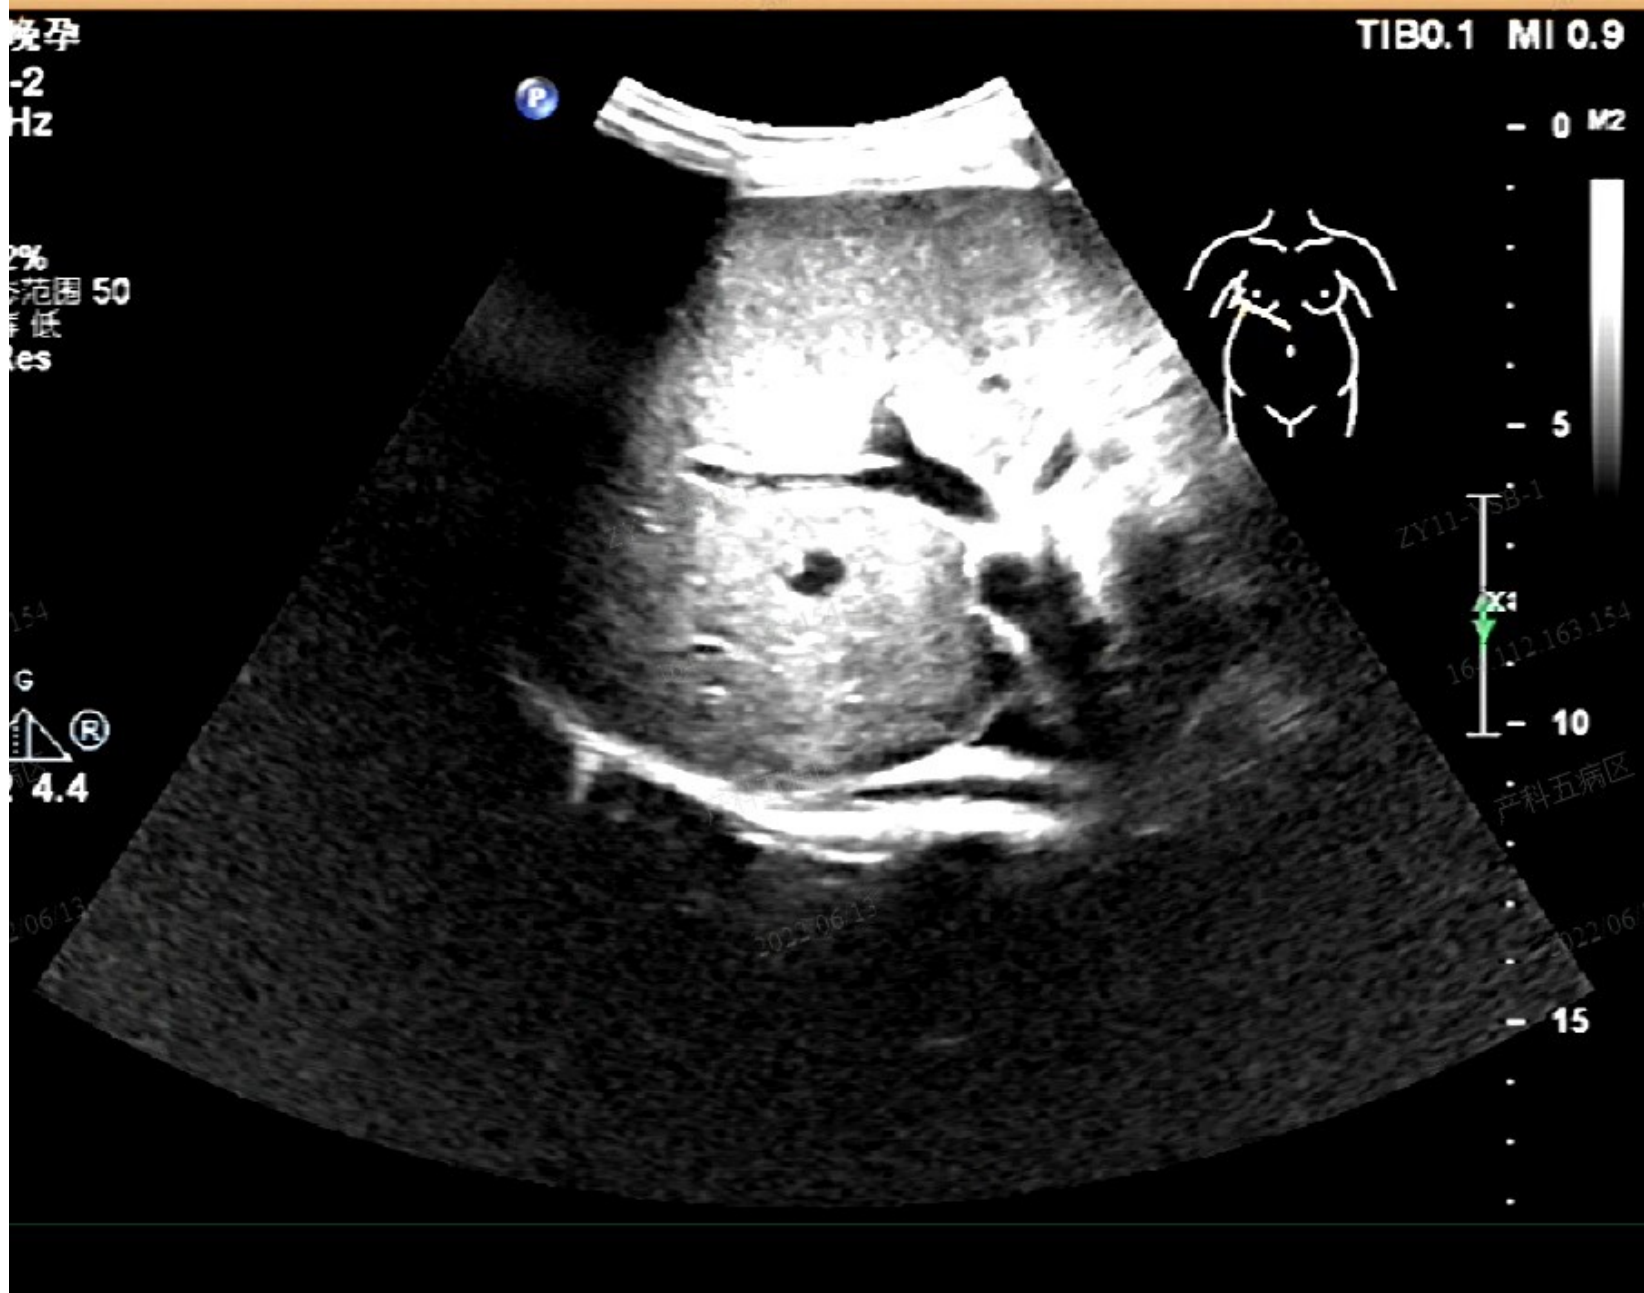

Supplement: d2mo00305h8.pdf [file d2mo00305h8.pdf]
